# Supplementary material for: Structure-function relationships in the nasal cavity of Arctic and subtropical seals
Source: PubMed Central journal article supplement (PMC10754691; doi:10.1016/j.bpj.2023.11.012), 2023-12-14
Supplement: mmc3.pdf [file mmc3.pdf]

# Structure-function relationships in the nasal cavity of Arctic and subtropical seals

Hyejeong L. Cheon,<sup>1</sup> Signe Kjelstrup,<sup>2,\*</sup> Nataliya Kizilova,<sup>1,3</sup> Eirik G. Flekkøy,<sup>4</sup> Matthew J. Mason,<sup>5</sup> and Lars P. Folkow<sup>6</sup>

<sup>1</sup>PoreLab, Department of Physics, Norwegian University of Science and Technology, NTNU, Trondheim, Norway; <sup>2</sup>PoreLab, Department of Chemistry, Norwegian University of Science and Technology, NTNU, Trondheim, Norway; <sup>3</sup>V.N. Karazin Kharkov National University, Kharkov, Ukraine; <sup>4</sup>PoreLab, Department of Physics, University of Oslo, Oslo, Norway; <sup>5</sup>Department of Physiology, Development & Neuroscience, University of Cambridge, Cambridge, UK; and <sup>6</sup>Department of Arctic and Marine Biology, UiT – The Arctic University of Norway, Tromsø, Norway

**ABSTRACT** The heating and moistening of inhaled air, and the cooling and moisture removal from exhaled air, are crucial for the survival of animals under severe environmental conditions. Arctic mammals have evolved specific adaptive mechanisms to retain warmth and water and restrict heat loss during breathing. Here, the role of the porous turbinates of the nasal cavities of Arctic and subtropical seals is studied with this in mind. Mass and energy balance equations are used to compute the time-dependent temperature and water vapor profiles along the nasal passage. A quasi-1D model based on computed tomography images of seal nasal cavities is used in numerical simulations. Measured cross-sectional areas of the air channel and the perimeters of the computed tomography slices along the nasal cavities of the two seal species are used. The model includes coupled heat and vapor transfer at the air-mucus interface and heat transfer at the interfaces between the tissues and blood vessels. The model, which assumes constant blood flow to the nose, can be used to predict the temperature of the exhaled air as a function of ambient temperature. The energy dissipation (entropy production) in the nasal passages was used to measure the relative importance of structural parameters for heat and water recovery. We found that an increase in perimeter led to significant decreases in the total energy dissipation. This is explained by improved conditions for heat and water transfer with a larger complexity of turbinates. Owing to differences in their nasal cavity morphology, the Arctic seal is expected to be advantaged in these respects relative to the subtropical seal.

**SIGNIFICANCE** We show here that the Arctic seal *Erignathus barbatus* has a lower respiratory energy loss than the subtropical seal *Monachus monachus*, when both are exposed to the same conditions. We show, using a dynamic model for the breathing cycle in the maxilloturbinate region, that the nasal cavity structure, expressed by the cross-sectional area of the air channel and the perimeter of this area, determines the energy efficiency of the heat and mass transfer. The structure of the Arctic seal nasal cavity, in particular the maxilloturbinate perimeter, helps the animal to reduce the energy dissipation 23% below that of the subtropical seal. Owing to differences in their nasal cavity morphology, the Arctic seal is expected to be advantaged in colder climates relative to the subtropical seal.

## INTRODUCTION

The structure-function relationships of tissues and organs of mammals are topics of wide interest (1–4). Arctic mammals can survive under extreme environmental conditions (low temperatures, limited food and water), possibly because they have evolved various anatomical structures and special-

ized physiology that allow them to reduce and control their energy dissipation, thereby maintaining their body heat and water losses at a low level (2,3,5). Heat is lost in a cold climate, not only through the skin, but also during breathing itself, by heat and moisture transfer from the animal to the surroundings.

The mammalian nasal cavity contains the maxilloturbinate (MT) bones; one on each side. The MTs have a complex structure known to play an important role in body heat exchange (1,6–10). When the cold air passes through the nasal cavity upon inhalation, it warms gradually until it reaches the core body temperature as found in the lung.

Submitted August 25, 2023, and accepted for publication November 15, 2023.

\*Correspondence: [signe.kjelstrup@ntnu.no](mailto:signe.kjelstrup@ntnu.no)

Editor: Alex Mogilner.

<https://doi.org/10.1016/j.bpj.2023.11.012>

© 2023 Biophysical Society.

This is an open access article under the CC BY license (<http://creativecommons.org/licenses/by/4.0/>).

In this process, the air also becomes saturated with water vapor. This conditioning of the air is important for proper lung function (1,11,12). Upon exhalation, it is unavoidable that some of this heat and water is lost, but adsorption will also take place from the air back into the tissues, reducing the heat and water losses to the environment. This reduction depends on ambient conditions as well as the particular structure of the MT bones (6–11,13–15).

Mathematical models of heat and mass transfer in the repetitive cycles of inhalation-exhalation may allow a better understanding of the physical processes involved in this exchange. A simplified biophysical model of the steady-state respiratory heat transfer was thus developed in the kangaroo rat, using the mass and energy balances for airflow between parallel plates and a concurrent flow of blood at a constant body temperature ( $T_{\text{body}}$ ) (16). Humidification of the inhaled air was described by the diffusion equation for water vapor. Anatomical and physiological features related to the efficiency of nasal heat exchange have been studied in several mammals, including camels (17), goats (18), koala (19), dogs (20), humans (11,12), and reindeer (9,13).

In a recent study (14), it was found that both Arctic and Antarctic seals have a nasal cavity with larger total cross-sectional area, containing more complex MTs than subtropical seals. This supports the idea that the nasal structures in polar seals have evolved in response to cold environmental conditions. Flekkøy et al. (21) modeled the countercurrent heat exchange along the nose, assuming the air to always be saturated with vapor. In this model (called model I in this paper) there was also a rapid exchange of heat with the blood that perfuses the MT mucosa, meaning that there was a significant amount of heat transfer in both directions to and from the blood. The blood flow was adjusted to give the experimental nose temperature. Model I did not investigate the dynamics of the heat and mass exchange and therefore the effect of a rate-limiting water condensation or evaporation at air-tissue interfaces. Also, model I did not include varying geometrical properties of the air passage within the nasal cavity. In the more sophisticated model presented here, model II, we therefore study water and heat exchange of the full breathing cycle with a varying cross-sectional airflow area and perimeter along the nose, and without any adjustment of blood flow, but at set airflow inlet and outlet temperatures. In model II we do *not* assume that the air is fully saturated with water vapor.

Our work concerns a part of the respiratory tract, the MT section, which is responsible for proper heating/cooling and moistening/demoistening of the inhaled/exhaled air at varying ambient temperature and humidity. We study the effect of varying geometry of the MT under various nonequilibrium conditions and the performance of this organ in different species. The remaining part of the respiratory tract will thus be kept constant; i.e., the processes in the pharynx, trachea, and bronchial part of the seals' respiratory tract are

assumed to be the same when we compare the species. The seal turbinate structure is so much more complicated than that of humans that it seems likely that the MT system is able to condition the air much more fully before it reaches the bronchial tree (22). This allows us to restrict the attention to the MT system alone.

We use model II to find the total entropy production,  $\Sigma_{\text{irr}}$ , of a quasi-3D model of the nasal cavity (model II) to measure variations in the energy efficiency of the nasal cavity function. This property has already been used as an efficiency measure of the respiratory systems of mammals and humans (6,23,24). The entropy production due to viscous dissipation in human lungs was calculated at various levels of humidity and branching of the bronchial tree of the lungs (23–25). The entropy production per day, measured for the resting state, was 50 kJ/K (24). Values depended on the ambient temperature and the relative humidity of the ambient air (23). In the human respiratory system, an analysis of the dissipated energy has shown an efficiency decrease of 21 or 16.5% for moderate or extreme levels of activity, respectively, compared with that of the resting state (26). Clearly, the energy budget of animals is a vital physiological consideration, but existing studies suggest that there will be differences in the efficiency of nasal heat exchange according to species and circumstances. We therefore use model II to compute the entropy production of the breathing cycle, to compare structure-function relationships in Arctic and subtropical seals. The aim of the work is to understand better the role of MT complexity in the functions of the nasal cavity under extreme environmental conditions.

The paper is structured as follows. In the [methods and materials](#), we recapitulate the anatomical and functional properties needed to model relevant seal noses. In model II, we present the details of the nonequilibrium thermodynamic model in use, as applied to the seal nose. We document the numerical solution procedure, give an overview of the cases studied, and compare the model with experimental results as far as possible. The numerical results are interpreted and analyzed in [results and discussion](#). A video showing the breathing dynamics is included in the supporting material. We hypothesize that the complexity of the nasal cavity in an Arctic seal, here represented by *Erignathus barbatus* (Eb), enables this animal to function with lower energy dissipation (entropy production) than the subtropical seal, *Monachus monachus* (Mm), when both are placed under Arctic conditions. Concluding remarks follow.

## METHODS AND MATERIALS

### Structure of the MT region

The geometry of the bony part of the nasal cavity is known from computed tomography (CT) images of the seal's skull (see [Fig. 1 a](#)). The nasal cavity starts at the vestibule, which lies just behind the nostrils. From here, the air passes through the MT and the nasopharynx, ultimately reaching the lungs.

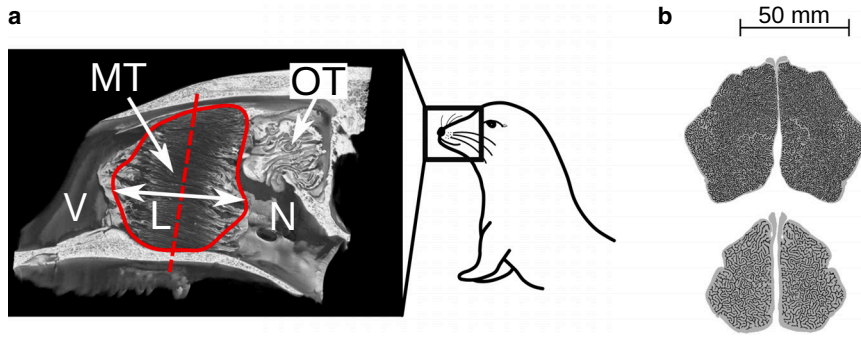

**FIGURE 1** Structure of the nasal cavities of the Arctic seal (Eb) and the subtropical seal (Mm). (a) The longitudinally sectioned CT reconstruction of the Arctic seal's skull with maxilloturbinate (MTs) of length  $L$  in the anteroposterior direction (contained within the solid red line) and olfactory turbinates (OTs). The inhaled air passes from the nostrils (not visible) through an open, vestibular region (V), through the MTs, and then through the nasopharynx (N). (b) Cross-sectional CT images of MT of the Arctic seal (top) and the subtropical seal (bottom) in approximately the position marked by the red dashed line in (a). Scale bar, 50 mm. CT images are reproduced with permission of Mason et al. (14), Copyright 2020 Elsevier. To see this figure in color, go online.

**Fig. 1 b** shows CT cross sections of the most complex region of MT in the bearded seal (Eb) and the Mediterranean monk seal (Mm). We call the Arctic seal Eb and the subtropical seal Mm for convenience.

The 3D volume of the MT was divided into 164 slices for the Arctic seal (Eb) and 172 slices for the subtropical seal (Mm) along the  $z$  axis in the anteroposterior direction, and a corresponding number of 2D slices (like those presented in **Fig. 1 b**) were obtained. For each slice, we measured the cross-sectional area available for airflow,  $A_a$ . This is the area contained within the MT mass that is shown by gray pixels in **Fig. 1 b**. The corresponding perimeter of the air-tissue interface,  $\gamma_a$ , is also shown. The value of  $\gamma_a$  multiplied by the thickness of the slice in the length direction gives the wall surface area for heat and water exchange at the location in question. The scans were of dried seal skulls; all measurements refer to dry MT bone (14), so  $A_a$  is technically speaking the cross-sectional area of the non-bony components in the MT. The measured results for  $A_a$  and  $\gamma_a$  of each section are shown in **Fig. 2** as a function of scaled position  $z^* = z/L$ .  $A_a(z^*)$  and  $\gamma_a(z^*)$  vary along the nose, with maximum values located approximately in the center of the MT.  $L$  is the length of the MT. A nondimensional parameter,  $z^*$ , was used to indicate position, because  $L$  differs between both individuals and seal species.

$A_a$  and  $\gamma_a$  had their minimum values near the ends, near  $z^* = 0$  and  $z^* = 1$  (see **Fig. 2, a** and **b**). Beyond these values, we assumed that no significant

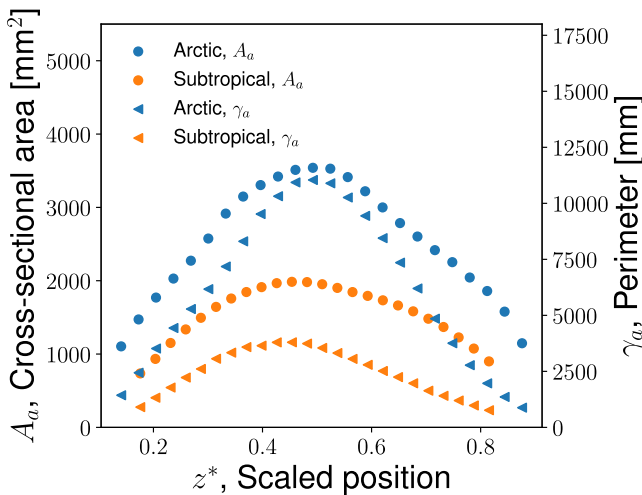

**FIGURE 2** The cross-sectional area ( $A_a$ ) of the channel for airflow and the corresponding perimeter ( $\gamma_a$ ) for the Arctic (Eb) and the subtropical (Mm) seals, as computed from CT data. Both variables are plotted as a function of scaled position,  $z^* = z/L$ , where  $L$  is the length of the MT region. Here,  $z^* = 0$  and  $z^* = 1$  refer to the distal (the nostrils) and proximal ends of the MT region, respectively. To see this figure in color, go online.

heat and water exchange took place.  $A_a$  reduces to zero at the start and the end because the MTs taper off there. However, the total area for airflow remains high at both ends, because there is space between the wall and the MT mass here. This is visible in **Fig. 1 a**. The airflow pathway outside the MT plays no role in heat and water exchange in the model, however, and is therefore ignored in this context.

In reality, the MT bone is not dry, but covered by soft tissue (mucosa), including epithelial cells, interstitial tissues with blood vessels, plus a liquid-containing mucus layer (27). This results in some inaccuracy in  $A_a(z^*)$  and  $\gamma_a(z^*)$ . The trends in the curves of **Fig. 2** should capture the true situation well, however. The data selected for analysis are represented by points in the range  $z^* = 0.18 - 0.82$  for the subtropical seal (Mm) and  $z^* = 0.14 - 0.87$  for the Arctic seal (Eb) (see **Fig. 2**). In the figures where we present results, these points define the endpoints and the length of the MT.

The measured variations in  $A_a(z^*)$  and  $\gamma_a(z^*)$  were used to create a quasi-3D model of the nasal passages, as was done earlier in reindeer (6). Instead of an airway with complex cross-sectional geometry (**Fig. 2**), we created a model tube that has the (varying) cross-sectional area for airflow  $A_a(z)$  and perimeter  $\gamma_a(z)$  along the  $z$  axis. This tube will be used for numerical computations for different boundary conditions. A continuous blood flow supplies all tissues in the nasal cavity, thus providing heating and moistening of the inhaled cold air. The contribution from the blood here is implicitly accounted for by the chosen boundary conditions.

### Model II

We constructed model II to study the system away from equilibrium since model I (21) assumes equilibrium at each position in the MT. The governing equations of our model II for the seal nose are area-averaged balance equations for mass and energy. Readers are referred to Jakobsen for further details (28, p. 12–60). The equations for coupled transport of heat and water at the mucus lining were further formulated according to nonequilibrium thermodynamics (29). Details and derivations of these equations are available (6). The equations are repeated for convenience in the [supporting material](#), section 1 (Eqs. S1–S42).

Model II has a compartmental system as described in **Fig. 3**, in agreement with earlier work (6,7). The nasal cavity is modeled by five subsystems as pictured in this figure: the air passage (a), the liquid mucus (m), the interstitial tissue (it), the arteries (art), and the veins (ven). **Fig. 3** shows the heat measurable fluxes,  $J'_{q,a-m}$ ,  $J'_{q,m-it}$ ,  $J'_{q,it-art}$ ,  $J'_{q,it-ven}$ , and the mass flux,  $J_w$ . These fluxes are all in the radial direction. The air flow, artery flow, and the vein flow,  $F_a$ ,  $F_{art}$ , and  $F_{ven}$ , are all in the axial direction (27). The direction from subsystem  $i$  to subsystem  $j$  is indicated by  $J_{i-j}$ . For example,  $J'_{q,a-m}$  is the measurable heat flux from the air (a) to the mucus (m). The flux  $J_w$  is positive in the direction from the air to the mucus. In other words, if  $J_w$  is positive, this means that there is condensation on the mucus lining and,

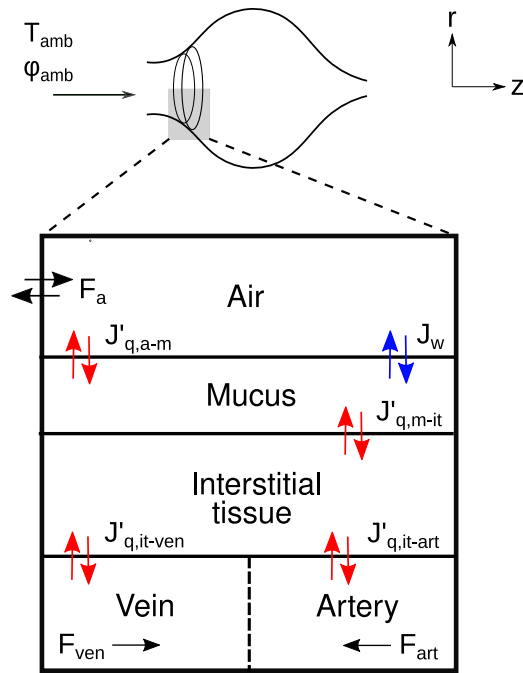

FIGURE 3 Subsystems of the model: air enters with ambient temperature  $T_{amb}$  and relative humidity  $\phi_{amb}$ . The nasal cavity with air is denoted (a), the liquid mucus layer (m), the interstitial tissue (it), vein (ven), and artery (art). Red and blue arrows indicate the heat and water fluxes, respectively, while black arrows indicate the flow of air and blood. All fluxes are in the  $r$ -direction and flows are in the  $z$ -direction. For a definition of fluxes, see text. To see this figure in color, go online.

if it is negative, evaporation takes place from the mucus lining. The flux  $J_m$  is the mass flux of liquid water from the underlying tissue to the mucus lining. This is not shown in Fig. 3. Heat and water transfer between the various nasal compartments were modeled using the following assumptions:

- 1) The composition of unsaturated air (with 90% relative humidity) is constant during the breathing cycle. The density of the air,  $\rho_a$ , is determined by the temperature, pressure, and water mole fraction and the Peng-Robinson equation of state (30).
- 2) The density of the mucus layer is constant and equal to the density of water. The density of the interstitial tissue is constant and is the same as the density of blood. The density of blood in arteries and veins, blood pressure, and blood flow rate are constant.
- 3) The metabolic heat production from all cells in the tissue of the system is ignored.
- 4) The pressure variation along the airflow channel is neglected. Flekkøy et al. (21) computed the pressure drop, which should be overcome by the respiratory muscles and the corresponding power (work per unit time). This is less than 0.7 W for both seals.
- 5) The volume fractions of arteries, veins, and interstitial tissue in the seal's nose are modeled in the same way as for reindeer (6,13). Details are given in the supporting material, section 1.
- 6) Airflows through the right and left MT masses took place over the length modeled. No flow took place between the MT and the nasal cavity walls.

All variables are computed for a cross section assuming radial symmetry. A variable is thus given as an average over the cross-sectional area along the length of the cylinder in the axial direction of the nasal cavity. This is a reasonable way to describe 3D variables by a 1D model (31,32)—which is then a quasi-1D model. The complexity of the nasal turbinates was expressed by the dimensionless number,  $\delta^* = \gamma_a/\sqrt{A_a}$ , where  $\gamma_a$  is the perimeter and  $A_a$  is the cross-sectional area of the airspace (7).

The breathing of the seal in the resting state was assumed to be periodical (6,33). A sinusoidal function was therefore used to model the breathing.

$$F_a = F_{a,max} \sin 2\pi \left( \frac{t}{t_{br}} \right) \quad (1)$$

Here,  $F_{a,max} = (\rho_a V_t / t_{br})$  where  $t$  is the time,  $t_{br}$  is the duration of a single breathing cycle,  $V_t$  is the tidal volume, and  $\rho_a$  is the density of the air. For convenience, we use a dimensionless time variable  $t^* = t/t_{br}$ . The values  $t_{br}$  and  $V_t$  are given in Table 1. Data for  $t_{br}$  are not available for the resting state, so we used data for active, swimming seals (34). While the estimated amplitude of the breathing signal may be reasonable, the frequency may be too high, leading to an overestimation of the energy dissipation.

Boundary conditions were taken to be similar to those used for reindeer in a previous study (6). The water mass fraction  $w_a$  was calculated from the ambient temperature  $T_{amb}$ . The water mass fraction is the ratio of water vapor mass to the total mass in the air, and this is used as a direct indicator to show how much water vapor is contained in the expired air from the lungs. The relative humidity  $RH = \phi_{amb}$  was assumed constant at the distal end ( $z^* = 0$ ) during inhalation, and at the proximal end ( $z^* = 1$ ) during exhalation. In the reference set of data, the relative humidity of the ambient air is 90%,  $\phi_{amb} = 90\%$ , at the inlet (see Table 1), the saturation value at  $z^* = 1$ ,  $\phi_{body} = 100\%$ . The data were taken for lung conditions given in Table 1. During inhalation and exhalation, heat is also supplied from or returned to the arteries, so as to maintain the temperature gradient in the channel. The temperature of arteries at  $z^* = 1$  was set as  $T_{body}$ . Blood in the arteries and veins exchange heat through capillaries in the interstitial tissue. On this basis, we give  $T_{art}$  at  $z^* = 0$  as  $T_{ven}$  at  $z^* = 0$ . The temperature of the mucus layer and interstitial tissue at  $z^* = 1$  is also set as  $T_{body}$ . This can be summarized as follows:

During inhalation,

$$\phi_a(z^* = 0) = \phi_{amb}.$$

$$T_a(z^* = 0) = T_{amb}.$$

$$T_m(z^* = 1) = T_{body}.$$

$$T_{it}(z^* = 1) = T_{body}.$$

$$T_{art}(z^* = 1) = T_{body}.$$

$$T_{ven}(z^* = 0) = T_{art}(z^* = 0).$$

During exhalation,

$$\phi_a(z^* = 1) = \phi_{body}.$$

$$T_a(z^* = 1) = T_{body}.$$

$$T_m(z^* = 1) = T_{body}.$$

$$T_{it}(z^* = 1) = T_{body}.$$

$$T_{art}(z^* = 1) = T_{body}.$$

$$T_{ven}(z^* = 0) = T_{art}(z^* = 0).$$



**TABLE 1 Geometrical and other data of the Arctic and subtropical seals**

| Symbol               | Description                          | Arctic seal           | Subtropical seal      | Unit           | Reference |
|----------------------|--------------------------------------|-----------------------|-----------------------|----------------|-----------|
|                      |                                      | (Eb)                  | (Mm)                  |                |           |
| $L$                  | MT length                            | $6.10 \times 10^{-2}$ | $5.16 \times 10^{-2}$ | m              | –         |
| $A_{a,\max}$         | max. cross-sectional area            | $3.55 \times 10^{-3}$ | $1.99 \times 10^{-3}$ | m <sup>2</sup> | –         |
| $\gamma_{a,\max}$    | max. perimeter                       | 11.1                  | 3.82                  | m              | –         |
| $d_m$                | mucus thickness                      | $1 \times 10^{-5}$    | $1 \times 10^{-5}$    | m              | (40)      |
| $T_{\text{body}}$    | core body temperature                | 36                    | 36                    | °C             | (15,22)   |
| $T_{\text{amb}}$     | ambient temperature                  | –30.0                 | 5.0/10.0/15.0         | °C             | (15,22)   |
| $\phi_{\text{body}}$ | relative humidity of deep body       | 100                   | 100                   | %              | (6)       |
| $\phi_{\text{amb}}$  | relative humidity of ambient air     | 90                    | 90                    | %              | (6)       |
| $M$                  | body mass                            | 180                   | 180                   | kg             | (41,42)   |
| $V_i$                | tidal volume                         | 6.3                   | 6.3                   | L              | (34)      |
| $t_{\text{br}}$      | duration of a single breathing cycle | 3.09                  | 3.09                  | s              | (34)      |

The  $A_a$  and  $\gamma_a$  vary with scaled position,  $z^*$ , so we present maximum values in this table,  $A_{a,\max}$  and  $\gamma_{a,\max}$ . For further definitions of symbols, see text.

### Energy dissipation (entropy production)

The total entropy production of a process can be regarded as originating from the (generalized) friction of the process. Whenever there are gradients in temperature or composition, there is friction associated with the attempt to reduce the gradients. Some of the total energy is dissipated in this process. This energy is lost as heat, it can no longer be used for work, and is therefore also called lost work. Evaporation at saturated conditions is an equilibrium process with zero friction. The dissipation can be observed by heating in the surroundings. The dissipated energy is the entropy production times the temperature of the surroundings,  $W_{\text{lost}} = T_a \Sigma_{\text{irr}}$ . Such losses must be compensated by the energy obtained from food.

The dissipation must not be confused with heat flow from one part to another. Heat flow can occur without losses when a process like condensation occurs at equilibrium conditions. The full phrase is *energy dissipated as heat to the surroundings*. The contributions to the total entropy production from each subsystem are  $\Sigma_{a-m}$ ,  $\Sigma_{m-it}$ ,  $\Sigma_{it-art}$ , and  $\Sigma_{it-ven}$ . The entropy production of an area element for heat and mass exchange in Fig. 3, is defined by the product sum of conjugate thermodynamic driving forces,  $X_i$ , and fluxes,  $J_i$  (35). For the cross-sectional area, the local entropy production is obtained by integration of the area:

$$\sigma = \sum_i \gamma J_i X_i \geq 0 \text{ for } i \in \{q, w\}, \quad (2)$$

where  $\gamma$  is the perimeter, subscripts  $q$  and  $w$  denote heat and water transfer, respectively. The entropy production is calculated for each subsystem and summed as  $\sigma = \sigma_{a-m} + \sigma_{m-it} + \sigma_{it-art} + \sigma_{it-ven}$ , where  $\sigma$  is the local entropy production from all subsystems,  $\sigma_{a-m}$  is the local entropy production from fluxes between air-mucus subsystems,  $\sigma_{m-it}$  is the local entropy production from fluxes between mucus-interstitial tissue,  $\sigma_{it-art}$  is the local entropy production from fluxes between interstitial tissue-artery, and  $\sigma_{it-ven}$  is the local entropy production from fluxes between interstitial tissue-vein. The local entropy production related to the air-mucus interface can be separated in two contributions from the heat flux ( $J_q$ ) and from the mass flux ( $J_w$ ), respectively, as  $\sigma_{a-m} = \sigma_{a-m,q} + \sigma_{a-m,w}$ .

The total entropy production during a breathing cycle,  $\Sigma_{\text{irr}}$ , is obtained by integrating  $\sigma$  over the time of the breathing cycle (inhalation and exhalation),

$$\Sigma_{\text{irr}} = \int_{\text{in}} \sigma dt + \int_{\text{ex}} \sigma dt \geq 0, \quad (3)$$

where "in" stands for the time duration of inhalation and "ex" stands for the time duration of exhalation. Here,  $\sigma_{a-m}$ ,  $\sigma_{a-m,q}$ , and  $\sigma_{a-m,w}$  are described as,

$$\int \sigma_{a-m} dt = \int \sigma_{a-m,w} dt + \int \sigma_{a-m,q} dt, \quad (4)$$

The explicit expressions for transport across the mucus surface are,

$$\begin{aligned} \Sigma_{a-m,w} = \int \sigma_{a-m,w} dt = \int \gamma_a J_w \left( - \left( \frac{\mu_{w,m}}{T_m} - \frac{\mu_{w,a}}{T_a} \right) \right. \\ \left. + h_{w,a} \left( \frac{1}{T_m} - \frac{1}{T_a} \right) \right) dt, \end{aligned} \quad (5)$$

$$\Sigma_{a-m,q} = \int \sigma_{a-m,q} dt = \int \gamma_a J'_{q,a-m} \left( \frac{1}{T_m} - \frac{1}{T_a} \right) dt, \quad (6)$$

We see from Eq. 6 how temperature differences as well as differences in the chemical potential of water (which is related to relative humidity) are associated with the dissipated energy. Frictional losses due to viscous flow have been shown to be small (21). The entropy production becomes larger, the larger these differences are, and the larger the flows of heat and water. The expressions are direct measures of energy dissipation that need to be replaced in terms of food or water.

### Numerical solution procedure

The code to solve the heat and mass balance equations for the breathing cycle was originally developed to study the reindeer nose (6). In this work, the code was modified to include geometrical, histological, and physiological data for seals, as presented in Table 1. The solution procedure is verified and presented in the supporting material, section 2.

The governing equations of model II include five partial differential equations (PDEs), one for each energy balance in the five subsystems depicted in Fig. 3. Two additional PDEs were obtained for the mass balances (see Eqs. S8–S21 in the supporting material, section 1). The set of PDEs was transformed into a set of ordinary differential equations by discretization in the  $z$ -direction. The number of grid points in use was  $N_z$ . We decided to use  $N_z = 24$  to have a reasonable computation time, cf. Table S1, which shows the computation time for each discretization number. In each energy balance PDE, the spatial derivative,  $\partial T / \partial z$ , was approximated by a fourth-order finite difference using the subroutine *dss020* (36).

The set of ordinary differential equations was solved by a MATLAB solver, *ode15s*, which solves stiff differential-algebraic equations, using

backward differentiation formulas, also known as Gear's method (37,38). We used a mass matrix that was associated with the boundary conditions listed above to obtain the temperature profile through the nose as a function of time. The simulation was running until the temperature and the total entropy production satisfied a stopping criterion. Approximately 200 cycles were needed to reach convergence (see [supporting material](#), section 2 for specific details).

Not only iteration convergence but also grid convergence was confirmed in this study. We verified grid convergence for the subtropical seal at  $T_{\text{amb}} = 10^\circ\text{C}$ . The number of control volumes was determined by the discretization number  $N_s \in \{6, 12, 24, 48\}$ . The solution of the expired air temperature was  $T_{\text{a,ex}} = 297.1 \pm 2.83\%$  (K) while the total entropy production was  $\Sigma_{\text{irr}} = 0.007 \pm 0.03\%$  ( $\text{JK}^{-1} \text{cyc}^{-1}$ ) (39) with  $N_s = 24$ . Further details about grid convergence and residual analysis are given in the [supporting material](#), section 2.

## Physical properties and physiological input

[Table 1](#) gives the essential physiological input data and the boundary conditions used in this work. In the absence of better knowledge, the same physiological input; i.e., body mass  $M$ , tidal volume  $V_T$ , and breathing cycle duration  $t_{\text{br}}$  is used for all seals. The data points shown by markers in [Fig. 2](#) were used as input variables for  $A_a$  and  $\gamma_a$ . The body temperature ( $T_{\text{body}}$ ) was constant, but the ambient temperature ( $T_{\text{amb}}$ ) varied. The liquid mucus layer thickness listed in [Table 1](#) is inferred from various animals. The lining is composed of a watery solution (5–8  $\mu\text{m}$ ) as the lower layer and the top of the lining is a viscous gel (5–10  $\mu\text{m}$ ) (40). The total thickness of the epithelial lining fluid was estimated to be 10  $\mu\text{m}$ . Further physical-chemical and physiological data are described in detail in the [supporting material](#), section 1.

## Case studies

Real and constructed seal conditions were used in this study to establish which seal nose geometry shows the highest energy efficiency. The following cases were studied.

- 1) Arctic seal (Eb) in normal life, resting in its natural habitat: in this case, the Arctic seal-specific data and boundary conditions were used, to establish characteristic properties of this seal in harsh environmental conditions ( $-30^\circ\text{C}$ ). The Arctic seal was also studied at an ambient temperature of  $10^\circ\text{C}$ .
- 2) Subtropical seal in an environmental temperature of  $10^\circ\text{C}$ , which would represent a cold day for a Mediterranean monk seal, Mm.
- 3) Subtropical seal in an Arctic environment, at  $-30^\circ\text{C}$ : the case was constructed to investigate how a subtropical seal would in principle perform under Arctic conditions.
- 4) The Arctic seal at  $-30^\circ\text{C}$  was also studied with modified  $A_a$  and  $\gamma_a$  (see [Table 2](#) and [Fig. 4](#)). The perimeter ( $\gamma_a$ ) and/or the cross-sectional area ( $A_a$ ) were increased in steps by a factor of 1.2 for sensitivity analysis and to study this aspect of the structure-function relationship of a seal nose.

**TABLE 2 Geometrical data used in the case studies**

| Case                    | A0 (Eb)               | A1             | A2           | A3             | Unit         | Reference |
|-------------------------|-----------------------|----------------|--------------|----------------|--------------|-----------|
| $A_{\text{a,max}}$      | $3.55 \times 10^{-3}$ | $\times 1.2^2$ | –            | $\times 1.2^2$ | $\text{m}^2$ | (14)      |
| $\gamma_{\text{a,max}}$ | 11.1                  | –              | $\times 1.2$ | $\times 1.2$   | m            | (14)      |

Arctic seal values provide A0. The perimeter ( $\gamma_a$ ) and the airspace cross-sectional area ( $A_a$ ) were (artificially) increased by a factor 1.2 as indicated.

[Table 2](#) shows the perturbations that were applied to study the effect of changes to  $A_a$  and  $\gamma_a$  ([Fig. 4](#)) on the nasal cavity entropy production in Arctic and subtropical seals. Changes like this could be achieved physiologically with a change in the complexity of MT structure and thickness of the nonbony layers. For example, a change in the cross-sectional area available for airflow,  $A_a$ , could be due to a change in the thickness of the mucosal layer (set to  $\sim 200 \mu\text{m}$  in the reference, A0 case, based on (27)) or of the mucus layer above that. Given that the thicknesses of these layers are estimated in our model, such perturbations allow us to assess the sensitivity of our predictions to these estimated values. The nasal mucosa of mammals can change thickness based on vascular congestion (43), so these changes in the model may also reflect physiological adjustments.

## RESULTS AND DISCUSSION

Results are shown in [Figs. 5, 6, 7, 8, and 9](#) and [Tables 3, 4, 5, 6, and 7](#), and in the video of the breathing cycle found in the [supporting material](#), section 5. Results are shown for both species of seals under ambient temperatures  $-30$  or  $10^\circ\text{C}$ .

### Model II and experimental results

Very few experiments report nose temperature in seals: the expired air temperature was measured as a function of ambient temperature in gray seals (*Halichoerus grypus*) by Folkow and Blix (15) and in northern elephant seals (*Mirounga angustirostris*) by Huntley et al. (22). Both sets of experimental results are shown in [Fig. 5](#) by triangles and circles, respectively. With an overlapping habitat, one might expect the results for northern elephant seal and gray seal to be more similar. However, there is some uncertainty in measurements related to single seal studies (body weight differences, etc.) and possibly also the fact that expired air temperature in seals appears to be subject to physiological (thermoregulatory) control (44). We did not attempt to use species-specific anatomical data to model the gray and elephant seals. It is nonetheless interesting to compare these experimental data with the model results we obtained for the Arctic seal, Eb.

The expired air temperature was therefore computed as a function of ambient temperature using model II with data from the Arctic seal (Eb). Boundary conditions were taken from the experiments (15). Results were not sensitive to a variation in the body temperature within 1 degree and  $36^\circ\text{C}$  was used. The model results, reported in [Fig. 5](#), fall on a straight (orange) line with slope 0.42. The measured expired air temperature of the gray seal decreased monotonically from  $+20$  to  $-30^\circ\text{C}$ , with a possible minimum at the lowest temperatures. The line fitted to these results (the dotted line) produced a similar slope as the model, 0.46, but an offset in temperature of more than  $5^\circ\text{C}$  was seen (see [Fig. 5](#)). Likely reasons for the difference between the model and the gray seal results are that 1) gray seals have a less elaborate MT system than Eb (14) and 2) we do not model the air passing around the outside of the MT mass, between the MT mass and the wall, where there might be

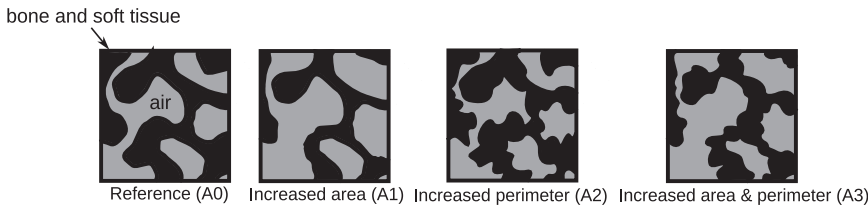

FIGURE 4 Schematic representation of the four cases with different perimeter or/and cross-sectional area for airflow (see Table 2).

less exchange. Live seals can furthermore exercise thermoregulatory control over  $T_{\text{ex}}$ , which will be high under warm conditions (10–20°C) (15,44).

Our model was based on the bearded seal, Eb, rather than either the elephant or gray seals. Since Eb has a more northerly distribution than the other two species, it is perhaps surprising that our model predictions fall between the two sets of experimental data. The model predictions are sensitive to morphological and physiological variables, which likely differ between these three species; however, this issue will be discussed in more detail later.

At low temperatures, the model fails to produce the observed increase in temperature at the tip of the nose. This failure has been explained earlier as due to the vascular system around the nose tip (21). There are blood vessels for heating in this region (27), which, in combination with increased ventilation (15), probably could explain the temperature increase seen in the experimental data. Since we are not accounting for this in model II, the deviation between the model and experiments is not surprising. The experimental results for the elephant seal fall closer to model II predictions for Eb.

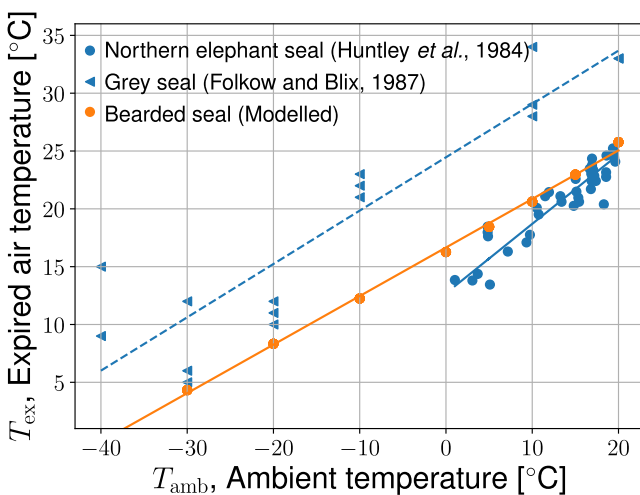

FIGURE 5 The expired air temperature of exhaled air as a function of ambient temperature, as measured in a northern elephant seal (blue circle markers) (22), a grey seal (blue triangle markers) (15), and computed by the present model using geometric data from Eb (bearded seal) (orange markers). Lines were fitted to experimental and modeled data by linear regression, giving  $0.6T_{\text{amb}}+12.7$  (blue solid line),  $0.46T_{\text{amb}}+24.5$  (blue dashed line), and  $0.42T_{\text{amb}}+16.7$  (orange line), respectively. To see this figure in color, go online.

## Models I and II compared

Flekkøy et al. (21) made the first attempt to model nasal heat and water exchange during breathing in seals. Their model, called model I, differs from model II in several respects. In model I the blood flow is tuned to provide sufficient heat for the nose to keep from freezing, mimicking the biological control function. The air temperature was computed as the average temperature of a Poiseuille flow of air saturated with water. In model II, the air temperature is a function of the resistance to heat and mass transfer at the mucus-air interface, and a given set of boundary conditions including a set blood temperature. The relative humidity of the air is below unity at the nostrils. While model I assumes equilibrium for water (no resistance) at the air-mucus interface, model II assumes that this resistance is considerable (45). While water and heat transfer go hand in hand in model I, they can be varied independently in model II, see supporting material, section 1. For this reason, model II is more suited for an evaluation of the dissipated energy in the nose. Water and heat transport may thus in the outset contribute to the entropy production in the nose in different quantifiable ways.

## The breathing cycle

### Temperature profiles

The temperature profiles along the nose were computed for the chosen boundary conditions, and separately for the air, mucus lining, interstitial tissue, artery, and vein subsystems. The dynamic process of breathing is shown in a video in the supporting material, section 5, Video S1. With the given transport properties and geometries, we found that the temperatures of the interstitial tissue, the arteries and veins were everywhere so close to each other that we chose to report only the temperature of the air and mucus lining. Fig. 6, a and b show snapshots of air ( $T_a$ ) and mucus layer ( $T_m$ ) profiles during inhalation and exhalation. Fig. 6, a and c show results for both seals under Arctic ambient conditions, while Fig. 6, b and d show both seal noses under moderate ambient temperatures.

During inhalation at  $t^* = 1/4$  the air flows from left to right in Fig. 6, a and b. Since the air comes from a relatively cold and low-humidity atmosphere, the air temperature is lower than the temperature in the mucus layer. Heat is transferred from the wet mucus wall to the air in the nasal cavity

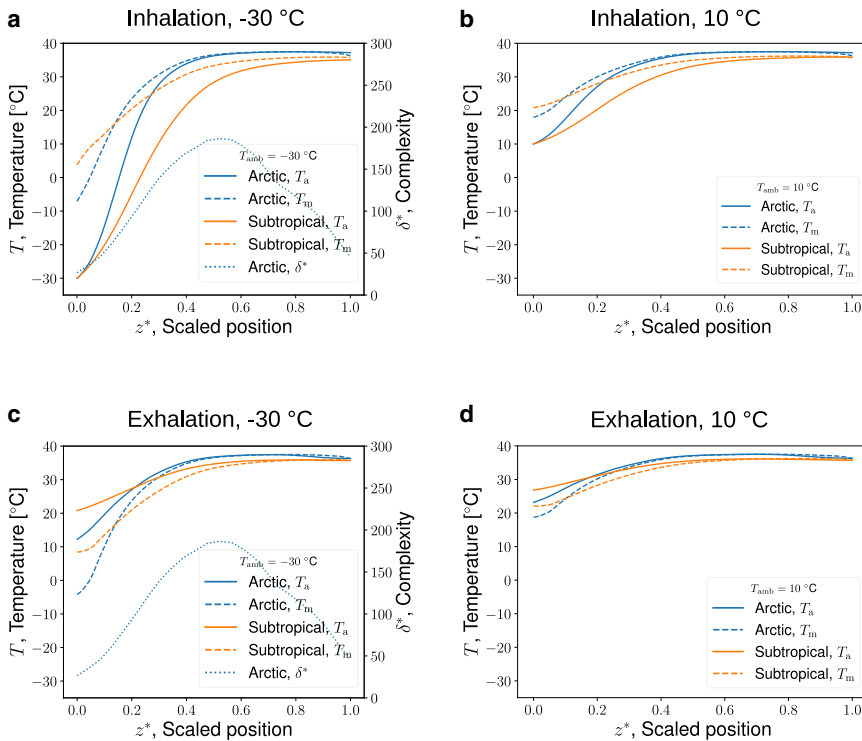

FIGURE 6 Snapshots of air temperature profiles in the MT of an Arctic seal (blue solid line) and a subtropical seal (orange solid line), (a and b) when  $t^* = 1/4$  (inhalation) and (c and d) when  $t^* = 3/4$  (exhalation). (a and c) At  $-30^\circ\text{C}$  and (b and d) at  $10^\circ\text{C}$ . The dotted lines in (a and c) show the complexity factor,  $\delta^*$ , of the Arctic seal. To see this figure in color, go online.

due to the temperature difference, as well as due to the evaporating vapor. The temperature of the mucus layer shows a jump at the nostril end of the MT, near  $z^* = 0$  for both seals and more so at  $-30^\circ\text{C}$  than at  $10^\circ\text{C}$ . During exhalation at  $t^* = 3/4$  the air flows from right to left in Fig. 6, c and d. Since the air comes from the lungs, the air temperature is higher than the temperature in the mucus layer. Heat is transferred from the air to the wet mucus wall of the nose due to the temperature difference, as well as due to the condensing vapor. The temperature of the mucus layer shows a significant change at the inlet, at  $z^* = 0.2$  for both seal conditions, and more at  $-30^\circ\text{C}$ .

The results are sensitive to geometric variables (see Fig. 6). The mucus and the mucosa (interstitial tissue) thick-

nesses have an impact on the temperature profile inside the nose but not on the expired air temperature (not shown in Fig. 5). The resistance of the mucus-air interface to evaporation has a small impact on flow turbulence, and so does a variation in the heat capacity of the blood. We have therefore chosen to keep model II as presented until more experimental data become available.

By increasing the mucus thickness 50-fold, the turning point of the temperature curve will move closer to the vestibular region, while maintaining the expired air temperature at  $z^* \sim 0$ . Such an increase in the mucus thickness serves to increase the buffer capacity for heat and water. The boundary conditions at the inlet to the nasopharynx may also play a role. This is presently not a variable. With

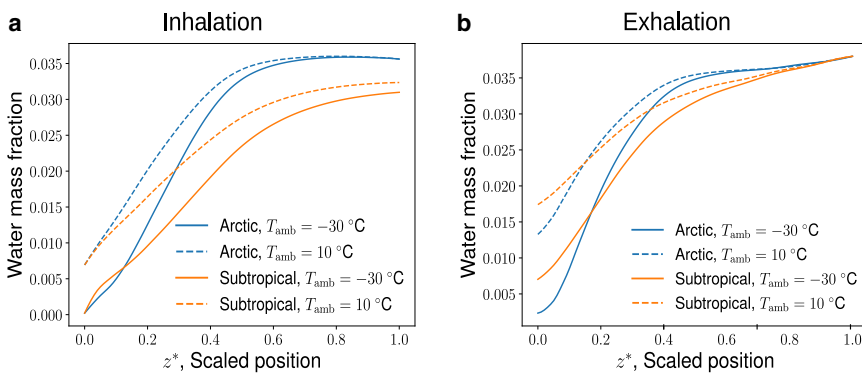

FIGURE 7 Water mass fraction profile of the air in the MT (a) during inhalation when  $t^* = 1/4$  and (b) during exhalation when  $t^* = 3/4$ . Results are shown as blue lines for the Arctic seal and as orange lines for the subtropical seal. The solid lines stand for Arctic temperature conditions,  $-30^\circ\text{C}$ , and the dashed lines stand for  $10^\circ\text{C}$ . To see this figure in color, go online.



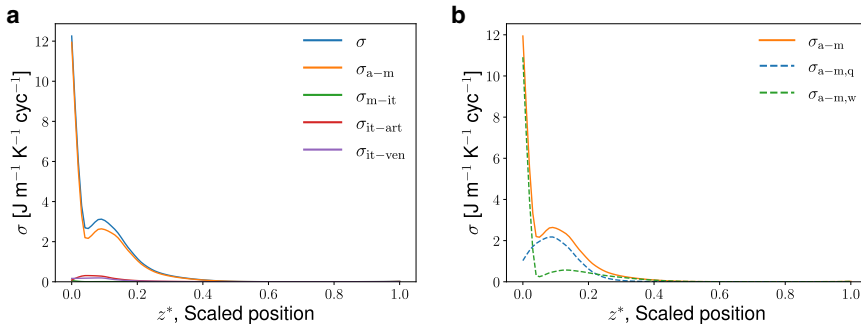

FIGURE 8 (a) Local entropy production for all subsystems and their sum,  $\sigma$  (blue line, total),  $\sigma_{a-m}$  (orange line, air-mucus),  $\sigma_{m-it}$  (green line, mucus-interstitial tissue),  $\sigma_{it-art}$  (red line, interstitial tissue-artery), and  $\sigma_{it-ven}$  (purple line, interstitial tissue-vein), of the Arctic seal at  $-30^{\circ}\text{C}$  as a function of scaled position,  $z^*$ . Results apply to a single breathing cycle. (b) Local entropy production of air subsystem only. Each contribution and its sum are shown  $\sigma_{a-m}$  (orange line, air-mucus),  $\sigma_{a-m,q}$  (blue dashed line, air-mucus, heat transfer), and  $\sigma_{a-m,w}$  (green dashed line, air-mucus, water transfer) as a function of scaled position,  $z^*$ , for the Arctic seal. To see this figure in color, go online.

more accurate knowledge of the thickness of the underlying mucosa layer (interstitial tissue), which may be subject to thickening through vascular congestion, together with that of the mucus which it secretes, the precision of the computations can be increased.

The variation in the profiles is similar under both ambient temperature conditions. As we approach the nostril end ( $z^* \sim 0$ ), the temperature difference between the air and the mucus layer increases at all conditions and for both seals. The difference is maximal closest to the nostril (see Fig. 6, *a-d*, solid and dashed lines), and this difference diminishes when  $z^*$  increases toward 1. The observation means that there is sufficient time and/or amount of tissue available for adequate heat and water recovery. It is curious that the mucus temperature is lower than the air temperature during exhalation at all values of  $z^*$  in both seals except when  $z^* \sim 0.8$  for the Arctic seal (see Fig. 6, *a-d*). The mucus is cooled in the inhalation step, and needs to be warmed during exhalation.

The subtropical seal shows an expired air temperature higher than that of the Arctic seal at both ambient tempera-

ture conditions. We infer that the Arctic seal is better equipped to retain its heat under all conditions. We return to this issue below.

The variations in the complexity,  $\delta^*$ , across the nose, shown in Fig. 6, *a* and *c*, have a maximum at  $z^* \sim 0.5$ . It is interesting that the position with the maximum  $\delta^*$  coincides with where the temperature of the air starts to change during both inhalation and exhalation. At this position, one may infer that the need for heating diminishes.

The temperature profile of the subtropical seal at  $10^{\circ}\text{C}$  changes monotonically from right to left, not far from linearly (see Fig. 6, *b* and *d*). This is unlike in the Arctic seal when  $T_{amb} = -30^{\circ}\text{C}$ . Here, the seal nose seems to provide for a more rapid change in temperature (see Fig. 6, *a* and *c*). In particular, the temperature change is large around  $z^* \sim 0.2$  in both Fig. 6, *a* and *b*.

This observation of the larger air and mucus temperature changes in the nasal cavity of the Arctic seal leads to the conclusion that the Arctic seal has a better ability to conserve body heat than the subtropical one. The ability must be ascribed to the MT morphology, as it is the only difference between the two seals within the model. These conclusions were possible because the physiological parameters were chosen to be the same and the seals were studied under the same boundary conditions.

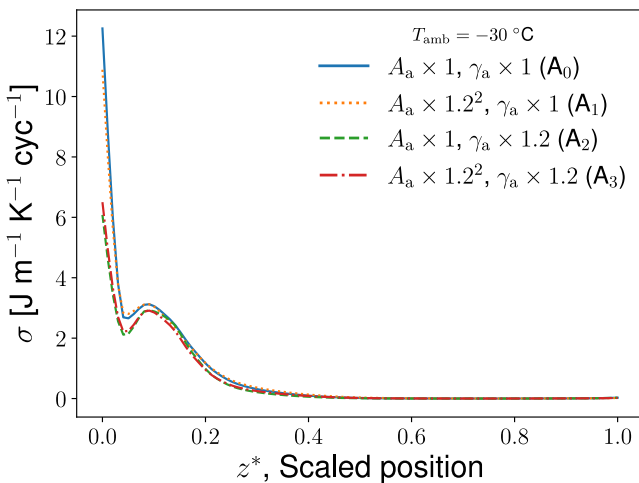

FIGURE 9 Local entropy production profile at the air-mucus interface as a function of scaled positions ( $z^*$ ) in the MT of Eb, for various choices of cross-sectional area and perimeter. To see this figure in color, go online.

### Water mass fraction profiles

The water mass fraction profiles in the air along the MT are presented in Fig. 7, *a* and *b* for both seal species at  $-30$  and  $10^{\circ}\text{C}$  ambient temperature conditions. The air with 90% relative humidity comes into the nostrils ( $z^* \sim 0$ ) and

TABLE 3 Heat and water loss in a single breathing cycle of Arctic and subtropical seals

| $T_{amb}$ ( $^{\circ}\text{C}$ ) | Heat loss (J/cyc) |             | Water loss (mg/cyc) |             |
|----------------------------------|-------------------|-------------|---------------------|-------------|
|                                  | Arctic            | Subtropical | Arctic              | Subtropical |
| -30                              | 940               | 1364        | 0.04                | 0.14        |
| 10                               | 492               | 737         | 0.11                | 0.19        |

**TABLE 4** Heat and water recovery of the Arctic and subtropical seals

| $T_{\text{amb}}$ (°C) | Heat recovery (%) |             | Water recovery (%) |             |
|-----------------------|-------------------|-------------|--------------------|-------------|
|                       | Arctic            | Subtropical | Arctic             | Subtropical |
| -30                   | 72.2              | 59.5        | 94.7               | 83.0        |
| 10                    | 73.7              | 60.4        | 80.6               | 67.8        |

becomes saturated due to evaporation from the underlying tissues. Water mass fraction increases as the air travels toward the nasopharynx, resembling the temperature profile in Fig. 6, *a* and *b*. When we compare the water mass fraction in the two seals at the nasopharynx, at  $z^* \sim 1$  we see a clear difference. The Arctic seal is able to add (and also to recover) much more water than the subtropical seal for the same ambient Arctic conditions, due to its ability to fully warm the inhaled cold air to equilibration with the body temperature. The blue lines are always above the orange lines at ( $z^* \sim 1$ ). This is despite the fact that the absolute humidity of the environment differs (it depends exponentially on the ambient temperature). The amount of water vapor adsorbed by the mucosa depends greatly on the geometry of the seal's MT. During exhalation in Fig. 7 *b* we see a bigger change in water mass fraction for Arctic seals than for subtropical seals when  $z^* = 1 \rightarrow 0$ . This is because relatively more water can be absorbed into the mucosal walls in the nasal cavity of the Arctic seal than in the subtropical seal, which also reflects a different water adsorption ability of the two species.

### Heat and water recovery

The heat and water loss and recovery were computed for a single breathing cycle from the profiles of Figs. 6 and 7 presented previously, using the equations in the supporting material, section 1.

During inhalation, water and heat are transferred to the inspired air in the nose from the mucus layer. During exhalation, water and heat are transferred in the opposite direction. The losses computed during one breathing cycle are shown in Table 3 for two ambient temperatures, while Table 4 gives the recovery in percentage of the amount that would have been lost if no recovery took place.

Under both temperature conditions, we see that the Arctic seal has a smaller loss of heat and water. Recovery of heat

**TABLE 5** Total entropy production ( $\Sigma_{\text{irr}}$ ) and dissipated energy ( $W_{\text{lost}}$ ) of the Arctic and subtropical seals for ambient temperatures ( $T_{\text{amb}}$ ) at -30 and 10°C

| $T_{\text{amb}}$ (°C) | Total entropy production ( $\Sigma_{\text{irr}}$ ) ( $\text{JK}^{-1} \text{cyc}^{-1}$ ) |             | Energy dissipation ( $W_{\text{lost}}$ ) ( $\text{J cyc}^{-1}$ ) |             |
|-----------------------|-----------------------------------------------------------------------------------------|-------------|------------------------------------------------------------------|-------------|
|                       | Arctic                                                                                  | Subtropical | Arctic                                                           | Subtropical |
| -30                   | 0.025                                                                                   | 0.041       | 6.0                                                              | 10.0        |
| 10                    | 0.004                                                                                   | 0.007       | 1.1                                                              | 2.0         |

**TABLE 6** Total and partial entropy production ( $\text{JK}^{-1} \text{cyc}^{-1}$ ) of the interface between air and mucus subsystems

| $T_{\text{amb}}$ (°C) | Arctic                |                         |                         | Subtropical           |                         |                         |
|-----------------------|-----------------------|-------------------------|-------------------------|-----------------------|-------------------------|-------------------------|
|                       | $\Sigma_{\text{a-m}}$ | $\Sigma_{\text{a-m,q}}$ | $\Sigma_{\text{a-m,w}}$ | $\Sigma_{\text{a-m}}$ | $\Sigma_{\text{a-m,q}}$ | $\Sigma_{\text{a-m,w}}$ |
| -30                   | 0.0220                | 0.0117                  | 0.0103                  | 0.0378                | 0.0201                  | 0.0177                  |
| 10                    | 0.0034                | 0.0011                  | 0.0023                  | 0.0061                | 0.0019                  | 0.0041                  |

The contributions to the total entropy production from heat and water transport are  $\Sigma_{\text{a-m,q}}$  and  $\Sigma_{\text{a-m,w}}$ , respectively.

and water is better for the Arctic than the subtropical seal under both conditions. In particular, at -30°C, the Arctic seal shows a very high water recovery, 94.7% (see Table 4). Most of the water added to the air during inhalation is then recovered during exhalation. The fact that the saturated water vapor pressure increases exponentially with temperature helps explain why the relative recovery of water is higher at -30°C than at 10°C (see Tables 3 and 4).

The heat leaving the nose per cycle of a subtropical seal is, according to the data of Table 3, ~45% larger than for the Arctic seal when both are under -30°C ambient temperature conditions. For these reasons, the MT structure of the Arctic seal is superior to that of the subtropical seal for both temperature conditions investigated in terms of both heat and water conserved.

Since the main difference, when both seals are exposed to the same ambient temperature, is their MT structure, these results point to the importance of this in the adaptation of seals to the Arctic. We did not investigate water and heat loss at higher environmental temperatures, but it should be recognized that, on a warm day, a seal may benefit from respiratory heat loss, although it does possess other (primarily behavioral) avenues to enhance heat dissipation (e.g., entering water).

### Entropy production and energy dissipation

The entropy production and the energy dissipated by heat and mass transfer were computed for one breathing cycle. The total entropy production and its contributions are presented in Tables 5 and 6, respectively. We see that there is a variation in the contributions to the total and local entropy production between the species and by changing ambient conditions. This variation can be linked directly to the MT structure and to the complexity of the MT structure. The more complex the MT is, the lower is the total entropy production of the breathing cycle. Recalling that entropy

**TABLE 7** Sensitivity of the Arctic seal (Eb) total entropy production to changes in the complexity factor  $\delta^*$ , using hypothetical seal geometries under Arctic conditions

| Total entropy production, w.r.t. A0 (%) | A1 (increased $A_a$ ) | A2 (increased $\gamma_a$ ) | A3 (increased and $\gamma_a$ ) |
|-----------------------------------------|-----------------------|----------------------------|--------------------------------|
| $\Sigma_{\text{irr}}$                   | -0.99                 | -22.9                      | -21.8                          |

production is a direct measure of the dissipated energy which must be replenished with energy from food, we may conclude that seals with a more complex MT will enjoy an advantage in cold conditions.

Consider first the total entropy production and the corresponding dissipated energy in the seal nose, as shown for both species' MT structures in Table 5. The total entropy production applies to the whole nose undergoing one breathing cycle. It is obtained by integrating the local entropy production over time and space. We see from Table 5 that the energy dissipation in subtropical seals is much greater than in Arctic seals at  $-30^{\circ}\text{C}$  (10.0 vs. 6.0 J cyc $^{-1}$ ). The Arctic seal is, relatively speaking, wasting much less energy than subtropical seals do when they both are put under Arctic ambient conditions. The corresponding numbers (2.0 vs. 1.1) are much smaller and more comparable in size when the ambient temperature reaches  $10^{\circ}\text{C}$ . These results are directly traceable to the more elaborate MT structure of the Arctic seal. The value of the total entropy production can be broken down into contributions to give more insight into the differences observed in Table 5. We have distinguished between five contributions; transfer between air and mucus lining,  $\sigma_{a-m}$ , mucus and interstitial tissue,  $\sigma_{m-it}$ , interstitial tissue and arteries  $\sigma_{it-art}$  or veins  $\sigma_{it-ven}$  (see methods and materials for details). Their values are reported for the Arctic seal under Arctic conditions,  $-30^{\circ}\text{C}$ , in Fig. 8 a. Other ambient conditions give similar trends.

Among all contributions in Fig. 8 a to the total value in Table 5, the local entropy production of the air-mucus interface,  $\sigma_{a-m}$ , is clearly the largest. It is followed by contributions from the mucus-interstitial tissue interface,  $\sigma_{m-it}$ , the interstitium-artery contact,  $\sigma_{it-art}$ , and the interstitium-vein contact,  $\sigma_{it-ven}$ . The  $\sigma_{it-art}$  and  $\sigma_{it-ven}$  did not contribute significantly to the total entropy production,  $\sigma$ , and are from now on neglected. In other words, the contributions that affect the total and local entropy production most are the water and heat exchange processes between air and mucus. The relative importance of heat and water recovery can also be studied by separating  $\sigma_{a-m}$  into contributions; i.e., from heat transport ( $\sigma_{a-m,q}$ ) and water transport ( $\sigma_{a-m,w}$ ). We found that the high local entropy production at the nostril end of the nasal cavity is due mostly to water transport. The contribution is largest right at the entrance (see Fig. 8, a and b), and can be explained by the chosen difference in chemical potential of water at the inlet (the deviation of the water vapor pressure from its saturation value). The contribution from heat transport dominates the entropy production when  $z^* > 0.05$ . The total entropy production depends on the ambient temperature (see Table 6). At  $-30^{\circ}\text{C}$ , heat transport explains a large part of the total entropy production, but the contribution from water exchange is of the same order of magnitude. At temperatures near  $10^{\circ}\text{C}$ , water transport is relatively more important. Neither of the two contributions appears more important than the other.

The dissipation is sensitive to changes in the MT structure. To see this we applied model II to three variations in the nasal cavity structure of the Arctic seal (Eb). The cross-sectional area available to airflow ( $A_a$  in case A0) was first increased by a factor of 1.2<sup>2</sup> (case A1), the perimeter  $\gamma_a$  was next increased by a factor of 1.2 (case A2), and finally area and perimeter were both increased (case A3). These cases are directly related to a change in the complexity of the MT structure, as  $\delta^* = \gamma_a/\sqrt{A_a}$  shows. Some of these changes could occur physiologically by the seal inflating or deflating its nasal mucosa through changes in blood vessel congestion. The effects of these changes on the entropy production are shown in Table 7 and Fig. 9.

Table 7 shows the contribution to the total entropy production from the various transport processes through the nose in the four cases described in Table 2. We see that the entropy production is sensitive to both airway area and perimeter but to a varying degree. A change in the perimeter has by far the larger influence on entropy production.

Fig. 9 shows the entropy production from heat and water transport between the air and mucus subsystems for each of the four cases in Table 2. The entropy production in the air and mucus of the Arctic seal (blue solid line), reference case A0, changes negligibly when we change the cross-sectional airway area only (yellow dotted line). An increase in the perimeter leads to a reduction of 22.9% in the entropy production (green dashed line). By again increasing the area (red dash-dotted line), there is a marginally smaller decrease in entropy production. This suggests that the perimeter of the MT structure is an important property for a seal living in the Arctic regarding energy dissipation. Relatively less energy is needed to compensate for energy dissipation in a nose with a large MT perimeter.

To obtain an overall perspective on the model results, we computed the energy dissipation on a macro level and compared it with the results for other animals from several references. Note that we need to consider the length of a nose from each animal species to calculate this energy dissipation by integrating the local entropy production plotted in Figs. 8 a and 9. A subtropical seal at  $10^{\circ}\text{C}$  ambient condition loses, according to model II, 2.0 J per breathing cycle, for a cycle of 3.1 s (see Table 1). This translates to 2.3 kJ/h or 55.9 kJ/day. For the reindeer nose (6), the corresponding number was 1.4 kJ/h or 34 kJ/day. Seals are known to have irregular breathing cycles featuring periodic apnea, so a simple averaging of a continuous cycle over the day may not be appropriate. Resting seals typically maintain breathing rates of  $\sim 10$  breaths per min (15,44), which would give energy dissipation values in the order of  $\sim 1$  kJ/h or  $\sim 23$  kJ/day.

More accurate anatomical data concerning mucus and interstitial tissue thicknesses would be helpful in improving the predictions of model II. The Arctic seal Eb enjoys good heat and water recovery based on its elaborate MT structure. This is likely also to be true for other polar seals, which have

similarly complex MT. Our data allow for a quantitative analysis of the hypothesis proposed by Mason et al. (14). The results are sensitive to geometric variables, of which we have direct information only about the bony MT structures. With more accurate knowledge of the morphology of the overlying soft tissue and mucus layer, the tidal volume, and pharynx boundary conditions, the precision in the computations can be increased. For now, we see that a 50-fold increase in the thickness of the mucus shifts the turning point of the temperature profile toward the nose opening.

## CONCLUSION

We have presented the time-dependent temperature and water mass fraction profiles of the air inspired and expired by the Arctic and subtropical seals, Eb and Mm, living in the Arctic and moderate temperature conditions, respectively. The breathing process was simulated for a quasi-1D representation of the MT structure. Anatomical and physiological parameters were used with various ambient boundary conditions to solve the mass, energy, and entropy balances. The set of equations, called model II, was able to predict, with reasonable accuracy, the temperature of the expired air measured as a function of ambient temperature. We found that the MT structure gives the Arctic seal (Eb) an advantage over the subtropical seal (Mm) in the recovery of both heat and water under Arctic ambient conditions. The more complex MT structure helps the Arctic seal to maintain a temperature similar to body temperature within the nasopharynx. An in-depth analysis of the energy dissipation of the breathing cycle showed that the perimeter of the MTs could play an essential role in limiting energy dissipation, especially at low ambient temperatures. An increase in perimeter leads to a relatively large decrease in total energy dissipation (entropy production).

## DATA AND CODE AVAILABILITY

The url for nose calculation code is: <https://github.com/hyejeonc/nose-calculations>.

## SUPPORTING MATERIAL

Supporting material can be found online at <https://doi.org/10.1016/j.bpj.2023.11.012>.

## AUTHOR CONTRIBUTIONS

H.L.C. adapted the computer program to deal with seal noses, validated the program, and carried out all calculations. M.J.M. provided new anatomical data based on CT scans. S.K. and N.K. designed the research plan and devised the methods. H.L.C., S.K., and N.K. wrote the first manuscript draft. L.P.F. and M.J.M. provided insight into biological structure and function. All authors discussed the meaning of the results in a biological context and helped edit the last versions of the manuscript.

## ACKNOWLEDGMENTS

H.L.C., S.K., N.K., and E.F. thank the Research Council of Norway for its Center of Excellence Funding Program, project no 262644 PoreLab. H.L.C. is grateful to the Research Council of Norway, project no. 308770 PredictCUI. L.P.F. thanks the Tromsø Research Foundation for financial support. We thank Arnoldus Schytte Blix, Øyvind Hammer, and Léa Wenger for the use of the CT scan data, which they helped to produce. H.L.C. appreciates Øyvind Wilhelmsen, Reidar Kristoffersen, and Magnus Aashammer Gjennestad for fruitful discussions about numerical procedures for verification and validation.

## DECLARATION OF INTERESTS

The authors declare no competing interests.

## REFERENCES

1. Yamaguchi, K. 2020. Structure-Function Relationships in Various Respiratory Systems. Springer. <https://link.springer.com/content/pdf/10.1007/978-981-15-5596-1.pdf>.
2. Blix, A. S. 2016. Adaptations to polar life in mammals and birds. *J. Exp. Biol.* 219:1093–1105. <https://journals.biologists.com/jeb/article-abstract/219/8/1093/16734>.
3. Maina, J. N. 2002. Structure, function and evolution of the gas exchangers: comparative perspectives. *J. Anat.* 201:281–304.
4. Perry, S. F., M. Lambertz, and A. Schmitz. 2019. *Respiratory Biology of Animals: Evolutionary and Functional Morphology*. Oxford University Press.
5. Ulu, G., A. S. Semerciöz, and M. Özilgen. 2021. Energy storage and reuse in biological systems: case studies. *Energy Storage*. 3:e253.
6. Magnanelli, E., Ø. Wilhelmsen, ..., S. Kjelstrup. 2017. The nasal geometry of the reindeer gives energy-efficient respiration. *J. Non-Equilibrium Thermodyn.* 42:59–78.
7. Solberg, S. B. B., S. Kjelstrup, ..., L. P. Folkow. 2020. Energy efficiency of respiration in mature and newborn reindeer. *J. Comp. Physiol. B.* 190:509–520.
8. Schmidt-Nielsen, K., F. R. Hainsworth, and D. E. Murrish. 1970. Counter-current heat exchange in the respiratory passages: effect on water and heat balance. *Respir. Physiol.* 9:263–276. <https://www.sciencedirect.com/science/article/pii/0034568770900757>.
9. Blix, A. S., and H. K. Johnsen. 1983. Aspects of nasal heat exchange in resting reindeer. *J. Physiol.* 340:445–454.
10. Negus, V. 1958. Comparative Anatomy and Physiology of the Nose and Paranasal Sinuses. E. & S. Livingstone. <http://117.239.25.194:7000/jspui/bitstream/123456789/1620/6/320-330.pdf>.
11. Walker, J. E. C., R. E. Wells, Jr., ..., W. O. MCQUISTON. 1962. Heat and water exchange in the respiratory tract. *Surv. Anesthesiol.* 6:256–259. [https://journals.lww.com/surveyanesthesiology/Citation/1962/06000/Heat\\_and\\_Water\\_Exchange\\_in\\_the\\_Respiratory\\_Tract.12.aspx](https://journals.lww.com/surveyanesthesiology/Citation/1962/06000/Heat_and_Water_Exchange_in_the_Respiratory_Tract.12.aspx).
12. Hanna, L. M., and P. W. Scherer. 1986. Regional control of local airway heat and water vapor losses. *J. Appl. Physiol.* 61:624–632.
13. Casado Barroso, I. L. 2014. The ontogeny of nasal heat exchange structures in Arctic artiodactyles, Master's thesis, UiT - Norges arktiske universitet, Master's thesis, UiT Norges arktiske universitet. <https://munin.uit.no/handle/10037/6542>.
14. Mason, M. J., L. M. D. Wenger, ..., A. S. Blix. 2020. Structure and function of respiratory turbinates in phocid seals. *Polar Biol.* 43:157–173.
15. Folkow, L. P., and A. S. Blix. 1987. Nasal heat and water exchange in gray seals. *Am. J. Physiol.* 253:R883–R889.
16. Collins, J. C., T. C. Pilkington, and K. Schmidt-Nielsen. 1971. A model of respiratory heat transfer in a small mammal. *Biophys. J.* 11:886–914. <https://www.sciencedirect.com/science/article/pii/S0006349571862628>.



17. Alsafy, M. A. M., S. A. A. El-Gendy, and M. M. A. Abumandour. 2014. Computed tomography and gross anatomical studies on the head of one-humped camel (*Camelus dromedarius*). *Anat. Rec.* 297:630–642.
18. Moawad, U. K., A. S. Awaad, and B. A. Abedellaah. 2017. Morphological, histochemical and computed tomography on the vomeronasal organ (Jacobson's organ) of Egyptian native breeds of goats (*Capra hircus*). *Beni-Suef University journal of basic and applied sciences.* 6:174–183. <https://www.sciencedirect.com/science/article/pii/S231485351730118X>.
19. Kratzing, J. E. 1984. The anatomy and histology of the nasal cavity of the koala (*Phascolarctos cinereus*). *J. Anat.* 138:55–65. <https://www.ncbi.nlm.nih.gov/pmc/articles/PMC1164310/>.
20. Craven, B. A., T. Neuberger, ..., G. S. Settles. 2007. Reconstruction and morphometric analysis of the nasal airway of the dog (*Canis familiaris*) and implications regarding olfactory airflow. *Anat. Rec.* 290:1325–1340.
21. Flekkøy, E. G., L. P. Folkow, ..., Ø. Wilhelmsen. 2023. Thermal modeling of the respiratory turbinates in arctic and subtropical seals. *J. Therm. Biol.* 112, 103402.
22. Huntley, A. C., D. P. Costa, and R. D. Rubin. 1984. The contribution of nasal countercurrent heat exchange to water balance in the northern elephant seal, *Mirounga angustirostris*. *J. Exp. Biol.* 113:447–454. <https://journals.biologists.com/jeb/article-abstract/113/1/447/4643>.
23. Dutta, A., H. Chattopadhyay, ..., M. Rahimi-Gorji. 2019. Entropy generation in the human lung due to effect of psychrometric condition and friction in the respiratory tract. *Computer Methods and Programs in Biomedicine.* 180, 105010. <https://www.sciencedirect.com/science/article/pii/S0169260719310788>.
24. Dutta, A., H. Chattopadhyay, and A. Biswas. 2019. A comparative study on the entropy generation in the human respiratory tract based on Hess–Murray law and Weibel experimented result. *J. Mech. Med. Biol.* 19, 1950046.
25. Weibel, E. R., A. F. Cournand, and D. W. Richards. 1963. Morphometry of the human lung. *Spring.* 1.
26. Dutta, A., and H. Chattopadhyay. 2021. Performance analysis of human respiratory system based on the second law of thermodynamics. *J. Therm. Biol.* 96, 102862. <https://www.sciencedirect.com/science/article/pii/S0306456521000292>.
27. Folkow, L. P., A. S. Blix, and T. J. Eide. 1988. Anatomical and functional aspects of the nasal mucosal and ophthalmic retina of phocid seals. *J. Zool.* 216:417–436.
28. Jakobsen, H. A. 2008. Chemical Reactor Modeling. Multiphase Reactive Flows. <https://link.springer.com/content/pdf/10.1007/978-3-319-05092-8.pdf>.
29. Kjelstrup, S., D. Bedeaux, ..., J. Gross. 2017. Non-equilibrium Thermodynamics for Engineers. World Scientific.
30. Peng, D.-Y., and D. B. Robinson. 1976. A new two-constant equation of state. *Ind. Eng. Chem. Fund.* 15:59–64.
31. Magnanelli, E., S. B. B. Solberg, and S. Kjelstrup. 2019. Nature-inspired geometrical design of a chemical reactor. *Chem. Eng. Res. Des.* 152:20–29.
32. Johannessen, E., and S. Kjelstrup. 2004. Minimum entropy production rate in plug flow reactors: An optimal control problem solved for SO<sub>2</sub> oxidation. *Energy.* 29:2403–2423. <https://www.sciencedirect.com/science/article/pii/S0360544204001100>.
33. Ishikawa, S., T. Nakayama, ..., T. Matsuzawa. 2006. Visualization of flow resistance in physiological nasal respiration: analysis of velocity and vorticities using numerical simulation. *Arch. Otolaryngol. Head Neck Surg.* 132:1203–1209. <https://jamanetwork.com/journals/jamaotology/article-abstract/484576>.
34. Reed, J. Z., C. Chambers, ..., P. J. Butler. 1994. Gas exchange of captive freely diving grey seals (*Halichoerus grypus*). *J. Exp. Biol.* 191:1–18.
35. Kjelstrup, S., and D. Bedeaux. 2008. Non-equilibrium Thermodynamics of Heterogeneous Systems. World Scientific.
36. Schiesser, W. E. 2012. The Numerical Method of Lines: Integration of Partial Differential Equations. Elsevier. [https://hero.epa.gov/hero/index.cfm/reference/details/reference\\_id/1777839](https://hero.epa.gov/hero/index.cfm/reference/details/reference_id/1777839).
37. Shampine, L. F., and M. W. Reichelt. 1997. The matlab ode suite. *SIAM J. Sci. Comput.* 18:1–22.
38. Shampine, L. F., M. W. Reichelt, and J. A. Kierzenka. 1999. Solving index-1 DAEs in MATLAB and Simulink. *SIAM Rev.* 41:538–552.
39. Computational Fluid Dynamics (CFD) Verification and Validation Web Site of the NPARC Alliance. <https://www.grc.nasa.gov/www/wind/valid/tutorial/spatconv.html>.
40. Kaulbach, H. C., M. V. White, ..., M. A. Kaliner. 1993. Estimation of nasal epithelial lining fluid using urea as a marker. *J. Allergy Clin. Immunol.* 92:457–465.
41. Burns, J. J. 1981. Bearded seals *Erignathus barbatus* Erxleben. Handbook of Marine Mammals.
42. Kenyon, K. 1981. Monk seals—*Monachus*. *Seals.*, SH, Ridgway, and RJ Harrison., eds. 2:195–220.
43. Widdicombe, J. 1997. Microvascular anatomy of the nose. *Allergy.* 52:7–11.
44. Folkow, L. P., and A. S. Blix. 1989. Thermoregulatory control of expired air temperature in diving harp seals. *Am. J. Physiol.* 257:R306–R310.
45. Wilhelmsen, Ø., T. T. Trinh, ..., D. Bedeaux. 2016. Coherent description of transport across the water interface: From nanodroplets to climate models. *Phys. Rev. E.* 93, 032801.



**Biophysical Journal, Volume 122**

**Supplemental information**

**Structure-function relationships in the nasal cavity of Arctic and subtropical seals**

**Hyejeong L. Cheon, Signe Kjelstrup, Nataliya Kizilova, Eirik G. Flekkøy, Matthew J. Mason, and Lars P. Folkow**

# Supplemental information

November 3, 2023

This document contains equations used in the model, numerical characteristics of solutions and more detailed information on heat and water fluxes.

## 1 Model equations

### 1.1 Balance equations

The energy balance of a cylindrical control volume (CV) is described as [1],

$$\left[ \begin{array}{c} \text{Rate of energy} \\ \text{accumulation} \\ \text{in CV} \end{array} \right] = \left[ \begin{array}{c} \text{Net inflow of} \\ \text{energy by heat flux} \\ \text{in z-direction} \end{array} \right] + \left[ \begin{array}{c} \text{Net inflow of} \\ \text{energy by heat flux} \\ \text{in r-direction} \end{array} \right] + \left[ \begin{array}{c} \text{Change of energy} \\ \text{due to changed amount of} \\ \text{components within CV} \end{array} \right] \quad (\text{S1})$$

Here, we rewrite all heat fluxes ( $J_q$ ) into measurable heat fluxes ( $J'_q$ ) as [2, p.26, 29, 225],

$$J_{q,r} = J'_{q,r} + \sum_i (h_i - h_{\text{ref}}) J_{i,r}, \quad (\text{S2})$$

$$J_{q,z} = J'_{q,z} + \sum_i (h_i - h_{\text{ref}}) J_{i,z}, \quad (\text{S3})$$

where  $J_q$  is the total heat flux,  $J_i$ , is the flux of  $i$ th component,  $h_i$  is the enthalpy of  $i$  component and  $h_{\text{ref}}$  is the reference enthalpy, and subscripts  $r$  and  $z$  specify the direction: therefore, the second term on the RHS (right-hand side) in Eqs. S2 and S3 above shows the enthalpy flux. We reformulate the term on the LHS (left-hand side) of Eq. S1 for the air by the cross-sectional area,  $A_a$ , the perimeter,  $\gamma_a$ , and the width of the CV,  $\Delta z$ , as,

$$\left[ \begin{array}{c} \text{Rate of energy} \\ \text{accumulation} \\ \text{in CV} \end{array} \right] = (A_a \Delta z) \rho_a c_{p,a} \frac{dT_a}{dt}, \quad (\text{S4})$$

where  $\rho_a$  is the density of the air,  $T_a$  is the temperature of the air,  $t$  is the time and  $c_{p,a}$  is the specific heat capacity of the air subsystem. Subscripts m, it, art and ven stand for the mucus, interstitial tissue, artery and vein subsystems, respectively, from now on. The first term on the RHS of Eq. S1 is,

$$\begin{aligned} \left[ \begin{array}{c} \text{Net inflow of} \\ \text{energy by heat flux} \\ \text{in z-direction} \end{array} \right] &= -A_a J_{q,z} \\ &= -A_a (J'_{q,z} + \sum_i (h_i - h_{\text{ref}}) J_{i,z}) \\ &= -A_a \left( \frac{F_a}{A_a} C_{p,a} \Delta z T_a + \frac{F_a}{A_a} \sum_i h_i \Delta z w_i \right), \end{aligned} \quad (\text{S5})$$

where  $F_a$  is the total mass flow in z-direction, which  $h_i$  is the specific enthalpy of the  $i$ th component and  $\Delta_z w_i$  is the mass fraction of the component  $i$  change in z-direction which is the ratio of the  $i$ th component mass to the total mass of the air including the  $i$ th component. The second term on the RHS in Eq. S1 is,

$$\begin{aligned} \left[ \begin{array}{c} \text{Net inflow of} \\ \text{energy by heat flux} \\ \text{in r-direction} \end{array} \right] &= -(\gamma_a \Delta z) J_{q,r} \\ &= -\gamma_a \Delta z (J'_{q,r} + \sum_i (h_i - h_{\text{ref}}) J_{i,r}) \\ &= -\gamma_a \Delta z (J'_{q,a-m} + J_w \sum_i (h_i - h_{\text{ref}}) w_i) \\ &= -\gamma_a \Delta z (J'_{q,a-m} + J_w (h_{w,a} - h_a)), \end{aligned} \quad (\text{S6})$$

where  $J'_{q,a-m}$  is the measurable heat flux from the air to the mucus subsystem and  $J_w$  is the water mass flux from the air to the mucus lining which appears as positive for condensation and negative for evaporation. Note that there is only one mass flux for a component, water vapor, which is  $J_1 = J_w$  and  $w_1 = 1.0$ . The amount of components in the air has changed over time and this is shown in the third term of RHS in Eq. S1. This is rewritten as,

$$\left[ \begin{array}{c} \text{Change of energy} \\ \text{due to changed amount of} \\ \text{components within CV} \end{array} \right] = \rho_a (A_a \Delta z) \sum_i h_i \frac{dw_i}{dt}. \quad (\text{S7})$$

By Eqs. S4-S7, energy balance of the air subsystem is,

$$\begin{aligned} (A_a \Delta z) \rho_a c_{p,a} \frac{dT_a}{dt} &= - (F_a c_{p,a} \Delta_z T_a + F_a \sum_i h_i \Delta_z w_i) \\ &\quad - \gamma_a \Delta z (J'_{q,a-m} + J_w (h_{w,a} - h_a)) \\ &\quad + \rho_a A_a \Delta z \sum_i h_i \frac{dw_i}{dt}. \end{aligned} \quad (\text{S8})$$

We change  $\Delta z$  to  $\partial z$  and  $dt$  to  $\partial t$  here with an assumption that  $\Delta z$  is infinitesimal. We omit subscript r and z for a convenience, then,

$$\begin{aligned} A_a \rho_a c_{p,a} \frac{\partial T_a}{\partial t} &= - \left( F_a c_p \frac{\partial T_a}{\partial t} + F_a \sum_i h_i \frac{\partial w_i}{\partial z} \right) - \gamma_a (J'_{q,a-m} + J_w (h_{w,a} - h_a)) + \rho_a A_a \sum_i h_i \frac{\partial w_i}{\partial t} \\ &= -F_a c_{p,a} \frac{\partial T_a}{\partial t} - \gamma_a J'_{q,a-m} - \gamma_a J_w (h_{w,a} - h_a) + A_a \rho_a \sum_i h_i \frac{\partial w_i}{\partial t} - F_a \sum_i h_i \frac{\partial w_i}{\partial z}. \end{aligned} \quad (\text{S9})$$

The energy balance of the mucus subsystem is,

$$\left[ \begin{array}{c} \text{Rate of energy} \\ \text{accumulation} \\ \text{in CV} \end{array} \right] = \left[ \begin{array}{c} \text{Net inflow of} \\ \text{energy by heat flux} \\ \text{in r-direction,} \end{array} \right] + \left[ \begin{array}{c} \text{Net inflow of} \\ \text{energy by source} \end{array} \right]. \quad (\text{S10})$$

Here, the heat flux from the air to mucus, the heat flux from mucus to the interstitial tissue and water supplied from the underlying tissues are considered. This is rewritten as,

$$\begin{aligned} A_m \rho_m c_{p,m} \frac{\partial T_m}{\partial t} &= \gamma_m (J'_{q,a-m} + \sum_i (h_i - h_{\text{ref}}) J_i) - \gamma_m J'_{q,m-it} + \gamma_m J_m (h_{w,m} - h_{\text{ref}}) \\ &= \gamma_m (J'_{q,a-m} + J_w (h_{w,a} - h_{\text{ref}})) - \gamma_m J'_{q,m-it} + \gamma_m J_m (h_{w,m} - h_{\text{ref}}) \\ &= \gamma_m (J'_{q,a-m} + J_w (h_{w,a} - h_{w,m})) - \gamma_m J'_{q,m-it}, \end{aligned} \quad (\text{S11})$$

$$\begin{aligned}
A_m \rho_m c_{p,m} \frac{\partial T_m}{\partial t} &= \gamma_m (J'_{q,a-m} + \sum_i (h_i - h_{\text{ref}}) J_i) - \gamma_m J'_{q,m-it} + \gamma_m J_m (h_{w,m} - h_{\text{ref}}) \\
&= \gamma_m (J'_{q,a-m} + J_w (h_{w,a} - h_{\text{ref}})) - \gamma_m J'_{q,m-it} + \gamma_m J_m (h_{w,m} - h_{\text{ref}}), \\
\rho_m c_{p,m} \frac{\partial T_m}{\partial t} &= \frac{1}{A_m} (\gamma_m (J'_{q,a-m} + J_w (h_{w,a} - h_{w,m})) - \gamma_m J'_{q,m-it}) \\
&= \frac{\gamma_m}{A_m} ((J'_{q,a-m} + J_w (h_{w,a} - h_{w,m})) - J'_{q,m-it}) \\
&= \frac{1}{d_m} ((J'_{q,a-m} + J_w (h_{w,a} - h_{w,m})) - J'_{q,m-it}), \tag{S12}
\end{aligned}$$

where  $\rho_m$  is the density of mucus and  $c_{p,m}$  is the specific heat capacity of the mucus subsystem. Other mucus subsystem variables (subscript m) are equivalent to those in the air subsystem, defined above. Note that mucus water flux  $J_m = -J_w$  from mass balance of the mucus subsystem where  $J_w$  is the mass flux of water generated from underlying tissues. The energy balance of the interstitial tissue is described as,

$$A_{it} \rho_{it} c_{p,b} \frac{\partial T_{it}}{\partial t} = \gamma_m J'_{q,m-it} - \gamma_{art} J'_{q,it-art} - \gamma_{ven} J'_{q,it-ven}, \tag{S13}$$

where  $T_{it}$  is the temperature of the interstitial tissue,  $J'_{q,it-art}$  is the measurable heat flux from the interstitial tissue to the artery in the r-direction,  $J'_{q,it-ven}$  is the measurable heat flux from the interstitial tissue to the vein in the r-direction,  $\rho_{it}$  is the density of the blood and  $c_{p,b}$  is the specific heat capacity of blood. Energy balance of artery and vein subsystems is described as,

$$A_{art} \rho_b c_{p,b} \frac{\partial T_{art}}{\partial t} = -F_{art} c_{p,b} \frac{\partial T_{art}}{\partial z} + \gamma_{art} J'_{q,it-art}, \tag{S14}$$

where  $A_{art}$  is the cross-sectional area of artery,  $F_{art}$  is the blood flow in the arterial blood,  $T_{art}$  is the temperature of the arterial blood,  $\gamma_{art}$  is the perimeter of the artery subsystem. For the vein subsystem,

$$A_{ven} \rho_b c_{p,b} \frac{\partial T_{ven}}{\partial t} = -F_{ven} c_{p,b} \frac{\partial T_{ven}}{\partial z} + \gamma_{ven} J'_{q,it-ven}, \tag{S15}$$

where  $A_{ven}$  is the cross-sectional area of the vein,  $F_{ven}$  is the blood flow in the vein,  $T_{ven}$  is the temperature of the venous blood and  $\gamma_{ven}$  is the perimeter of the vein subsystem. The mentioned cross-sectional areas and perimeters of interstitial tissue, mucus lining, artery and vein subsystems are described specifically in the following section.

Similarly, mass balance of a cylindrical CV is described as follows. Mass balance of the air without water vapor (dry air) and water vapor are written as,

$$\frac{\partial (A_a \rho_{dry})}{\partial t} = -\frac{\partial F_{dry}}{\partial z}, \tag{S16}$$

$$\frac{\partial (A_a \rho_{w,a})}{\partial t} = -\frac{\partial F_{w,a}}{\partial z} + J_w \gamma_a, \tag{S17}$$

where  $\rho_{dry}$  is the density of the dry air,  $\rho_{w,a}$  is the density of the water vapour,  $F_{dry}$  is the mass flow of the dry air and  $F_{w,a}$  is the mass flow of the water vapor.  $\rho_a$  is a sum of  $\rho_{dry}$  and  $\rho_{w,a}$  ( $\rho_a = \rho_{dry} + \rho_{w,a}$ ), and  $F_a$  is a sum of  $F_{dry}$  and  $F_{w,a}$  ( $F_a = F_{dry} + F_{w,a}$ ). Mass balance of the water liquid in the mucus layer is described as,

$$\frac{\partial (A_m \rho_m)}{\partial t} = J_w \gamma_a + J_m \gamma_a = 0. \tag{S18}$$

Mass balance for the interstitial tissue, artery and vein all are 0 on the RHS due to the assumption that  $\rho_b = \rho_{it} = \text{constant}$  and  $F_{art} = -F_{ven} = \text{constant}$ . This is written as,

$$\frac{\partial (A_{it} \rho_{it})}{\partial t} = 0, \tag{S19}$$

$$\frac{\partial (A_{art} \rho_b)}{\partial t} = -\frac{\partial F_{art}}{\partial z} = 0, \tag{S20}$$

$$\frac{\partial(A_{\text{ven}}\rho_b)}{\partial t} = -\frac{\partial F_{\text{ven}}}{\partial z} = 0. \quad (\text{S21})$$

## 1.2 Equations of transport

Non-equilibrium thermodynamics [3] defines the fluxes ( $J$ ) and conjugate forces ( $X$ ) from the entropy production as,

$$\sigma = \sum_i J_i X_i \geq 0 \quad \text{for } i \in \{q, w\}. \quad (\text{S22})$$

Eq. 2 in the main text is the local entropy production regarding quasi-1D interpretation [4, 5], therefore, this is obtained by multiplying the perimeter ( $\gamma$ );  $\sigma = \sum_i \gamma J_i X_i$ . Subscripts  $q$  and  $w$  denote heat and water transfer, respectively. By the linear force-flux relations,

$$X_k = \sum_j R_{kj} J_j \quad \text{for } k, j \in \{q, w\}, \quad (\text{S23})$$

where specific values for the resistivities,  $R_{kj}$ , are listed in Section 4. The entropy production is calculated for each subsystem and summed as  $\sigma = \sigma_{\text{a-m}} + \sigma_{\text{m-it}} + \sigma_{\text{it-art}} + \sigma_{\text{it-ven}}$  where  $\sigma$  is the local entropy production from all subsystems,  $\sigma_{\text{a-m}}$  is the local entropy production from fluxes between air-mucus subsystems,  $\sigma_{\text{m-it}}$  is the local entropy production from fluxes between mucus-interstitial tissue,  $\sigma_{\text{it-art}}$  is the local entropy production from fluxes between interstitial tissue-artery and  $\sigma_{\text{it-ven}}$  is the local entropy production from fluxes between interstitial tissue-vein. The local entropy production related to the air-mucus interface can be separated in two contributions, from the heat flux and from the mass flux, respectively, as  $\sigma_{\text{a-m}} = \sigma_{\text{a-m,q}} + \sigma_{\text{a-m,w}}$ .

In most subsystems, there is only heat flux between two subsystems, i.e., mucus-interstitial tissue, interstitial tissue-artery and interstitial tissue-vein. We write this as:

$$\frac{1}{T_j} - \frac{1}{T_i} = R_{q,i-j} J_{q,i-j}, \quad (\text{S24})$$

where  $T_j$  and  $T_i$  are the temperatures of subsystem  $j$  and  $i$ , respectively, and  $R_{q,i-j}$  is the overall thermal transport coefficient.  $R_{q,i-j}$  is the sum of resistances in series [6, p.104],

$$R_{q,i-j} = R_{q,i}^{\text{conv}} + R_{q,i-j}^{\text{interf}}, \quad (\text{S25})$$

$$R_{q,i-j}^{\text{conv}} = \frac{1}{T_i^2 h_i}, \quad (\text{S26})$$

where  $R_{q,i}^{\text{conv}}$  is the convective thermal transport coefficient of subsystem  $i$ ,  $R_{q,i-j}^{\text{interf}}$  is the conductive thermal transport coefficient at the interface between two subsystems,  $i$  and  $j$ , and  $h_i$  is the convective heat transfer coefficient of system  $i$ . Note that  $R_{q,i}^{\text{conv}}$  is non-zero for subsystems of the artery and vein but not for the interstitial tissue and the mucus, and we will deal with the thermal transfer coefficient related convective flow for the air later. The  $h_i$  is determined by Nusselt number,  $\text{Nu}$ , which is a ratio between heat transfer by convection and heat transfer by conduction:

$$h_i = \frac{\text{Nu}\lambda}{D_i}. \quad (\text{S27})$$

The  $\text{Nu}$  is 3.66 for convective and laminar blood flow in a cylinder [7, p.676],  $\lambda$  is the thermal conductivity of blood and  $D_i$  is the hydraulic diameter of a channel of subsystem  $i$  [8]:

$$D_i = \frac{4\gamma_i}{A_i}. \quad (\text{S28})$$

Here  $\gamma_i$  is the perimeter of subsystem  $i$  and  $A_i$  is the cross-sectional area of subsystem  $i$ .

For the subsystem related to the coupled transport of heat and mass, for example, the air and mucus, the coupled force-flux relation is described as regarding non-equilibrium thermodynamics [2, p.100],



$$\frac{1}{T_m} - \frac{1}{T_a} = R_{\text{qq,a-m}} J'_{\text{q,a-m}} + R_{\text{q}\mu,\text{a-m}} J_w, \quad (\text{S29})$$

$$- \left( \frac{\mu_{\text{w,m}}}{T_m} - \frac{\mu_{\text{w,a}}}{T_a} \right) + h_{\text{w,a}} \left( \frac{1}{T_m} - \frac{1}{T_a} \right) = R_{\mu\text{q},\text{a-m}} J'_{\text{q,a-m}} + R_{\mu\mu,\text{a-m}} J_w, \quad (\text{S30})$$

where  $\mu_{\text{w,m}}$  is the chemical potential of the mucus, the same as for the liquid water,  $\mu_{\text{w,a}}$  is the chemical potential of the water vapor in the air and a subscript q stands for the heat transport and  $\mu$  is for the mass transport. Onsager reciprocal relation gives the fact that the coupling coefficients are equal, therefore, the number of independent coefficients are reduced to 3 which are  $R_{\text{qq,a-m}}$ ,  $R_{\text{q}\mu,\text{a-m}} = R_{\mu\text{q},\text{a-m}}$  and  $R_{\mu\mu,\text{a-m}}$ . The same approach introduced previously for the heat transport is applied here also,

$$R_{\text{qq,a-m}} = R_{\text{qq,a}}^{\text{conv}} + R_{\text{qq,a-m}}^{\text{interf}} + R_{\text{qq,m}}^{\text{conv}}, \quad (\text{S31})$$

$$R_{\text{qq,a-m}}^{\text{conv}} = \frac{1}{T_a^2 h}, \quad (\text{S32})$$

and  $R_{\text{qq,a-m}}^{\text{interf}}$ ,  $R_{\mu\mu,\text{a-m}}^{\text{interf}}$  and  $R_{\mu\text{q},\text{a-m}}^{\text{interf}}$  are tabulated in Appendix C which is the finding from [9]. To obtain  $h$ , heat transfer coefficient (or film coefficient), Nu is calculated by the Chilton-Colburn analogy [7, p.441]. We assume that the airflow in the maxilloturbinate is in the turbulent regime. This is because the turbinate structure of the seal is much more complex than that of the humans, as discussed [10, 11]. The Nu is,

$$\text{Nu} = 0.125 f \text{RePr}^{1/3}, \quad (\text{S33})$$

where  $f$  is the friction factor, Re is the Reynolds number and Pr is the Prandtl number. The  $f$  is estimated from a study of human nasal cavity [12] as,

$$f = \frac{47.78}{\text{Re}} (1 + 0.127 \text{Re}^{0.489}), \quad (\text{S34})$$

and Reynolds number (Re) depends on the airflow and hydraulic diameter: the value obtained during simulation was  $\sim 1000$ . This is a variable varying in time with the breathing dynamics. Flekkøy et al. found a slightly smaller and constant Re for flow between parallel plates [13]. We assume here that convection can be ignored, which means that,

$$R_{\mu\text{q},\text{a-m}} = R_{\mu\text{q},\text{a-m}}^{\text{interf}}. \quad (\text{S35})$$

The overall mass transfer coefficient is described as,

$$R_{\mu\mu,\text{a-m}} = R_{\mu\mu,\text{a}}^{\text{conv}} + R_{\mu\mu,\text{a-m}}^{\text{interf}} + R_{\mu\mu,\text{m}}^{\text{conv}}, \quad (\text{S36})$$

and

$$R_{\mu\mu,\text{a-m}}^{\text{conv}} = \frac{1}{T_a k_c} \frac{\partial \mu_{\text{w,a}}}{\partial \rho_{\text{w,a}}}, \quad (\text{S37})$$

where  $k_c$  is the convective mass transfer coefficient which is calculated from the Sherwood number for turbulent air flow [7, p.757, 761] as,

$$k_c = \frac{\text{Sh} D_{\text{w,a}}}{D_a}, \quad (\text{S38})$$

$$\text{Sh} = 0.023 \text{Re}^{0.8} \text{Sc}^{1/3}, \quad (\text{S39})$$

where Sc is the Schmidt number. Sc is defined as,

$$\text{Sc} = \frac{\nu}{D_{\text{AB}}}, \quad (\text{S40})$$

where  $\nu$  is the kinematic viscosity which is the dynamic viscosity divided by the density of the air, and  $D_{\text{AB}}$  is the mass diffusivity of the air [7, p.724, 761].

We also tested the Nusselt and Sherwood numbers in Eqs. S33 and S39 in the laminar flow regime, because we do not know whether the airflow within the seal maxilloturbinate is turbulent or laminar [10, 11]. We found that the temperature profile in Fig. 6 of the main text does not vary significantly if the expressions for laminar flow as follows are used [7, p.780]:

$$\text{Nu} = 1.86 \left( \frac{\text{RePr}D_a}{L} \right)^{1/3} \left( \frac{\mu_a}{\mu_{\text{wall}}} \right), \quad (\text{S41})$$

$$\text{Sh} = 3.66, \quad (\text{S42})$$

where  $\mu_{\text{wall}}$  is the dynamic viscosity of maxilloturbinate wall and  $\mu_a$  is the dynamic viscosity of the air.

### 1.3 Tissue characteristics

We briefly describe here how we calculate the composition of tissue for seals. We describe the input variables related to the cross-sectional area of the air channels and the perimeter of the mucus lining. Due to a lack of experimental data, all values are approximated by corresponding values estimated for a reindeer [10, 14, 15, 16].

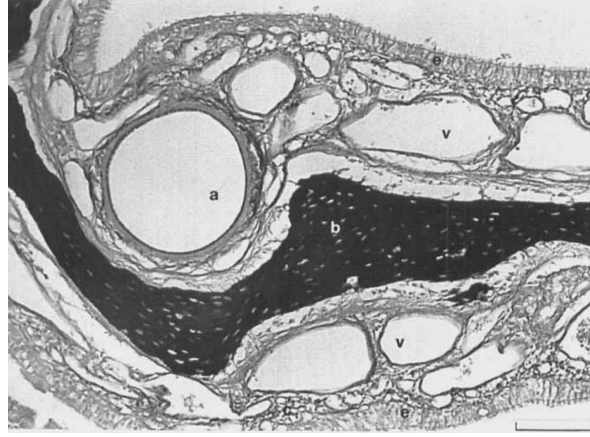

Figure S1: Cross-section of a turbinates branch section from a grey seal, *Halichoerus grypus*. The scale bar is  $100 \mu\text{m}$ . a stands for the lumen of an artery, v labels the lumina of veins, b refers to the bony part of the maxilloturbinate, e refers to the epithelium and the white area above the epithelial layer is the air cavity. The image is reproduced with permission of Folkow et al. [17], © 1988 Wiley.

| Position (reduced scale by $L$ )                 | 0.2                  | 0.4                  | 0.6                  | 0.8                  | 1.0                  |
|--------------------------------------------------|----------------------|----------------------|----------------------|----------------------|----------------------|
| $\hat{\gamma}_{\text{art}}$ [m/m]                | 0.77                 | 0.62                 | 0.32                 | 0.33                 | 0.44                 |
| $\hat{A}_{\text{art}}$ [ $\text{m}^2/\text{m}$ ] | $5.8 \times 10^{-5}$ | $3.9 \times 10^{-5}$ | $1.2 \times 10^{-5}$ | $1.5 \times 10^{-5}$ | $3.8 \times 10^{-5}$ |
| $r_{\text{art}}$                                 | 0.053                | 0.035                | 0.019                | 0.015                | 0.048                |
| $\hat{\gamma}_{\text{ven}}$ [m/m]                | 3.31                 | 2.76                 | 1.70                 | 1.51                 | 2.20                 |
| $\hat{A}_{\text{ven}}$ [ $\text{m}^2/\text{m}$ ] | $6.7 \times 10^{-4}$ | $6.1 \times 10^{-4}$ | $1.9 \times 10^{-4}$ | $2.3 \times 10^{-4}$ | $5.5 \times 10^{-4}$ |
| $r_{\text{ven}}$                                 | 0.42                 | 0.38                 | 0.25                 | 0.20                 | 0.26                 |

Table S1: Cross-sectional area and perimeter of arteries and veins at various positions along the reindeer nose [14], where the nose length is  $L$ . Fraction ( $r_{\text{art}}$  and  $r_{\text{ven}}$ ) here refers to the fraction of the area which is occupied by arteries from the total cross-sectional area of the tissue. Cross-sectional area ( $\hat{A}$ ) and perimeter ( $\hat{\gamma}$ ) are proportional to the perimeter of the air cavity,  $\gamma_a$ . Units in brackets are therefore described as per meter. All variables related to the interstitial tissue are computed from Eqs. S45-S47.

The thickness of the mucus lining of the seal was set to  $10 \mu\text{m}$  according to [15, 16]. These authors assumed that the thickness of the mucus lining is similar in all animal species. The perimeter of the mucus lining is similar to the perimeter of the air cavity. The cross-sectional area of the mucus lining then is equal to the product of the perimeter and the thickness,

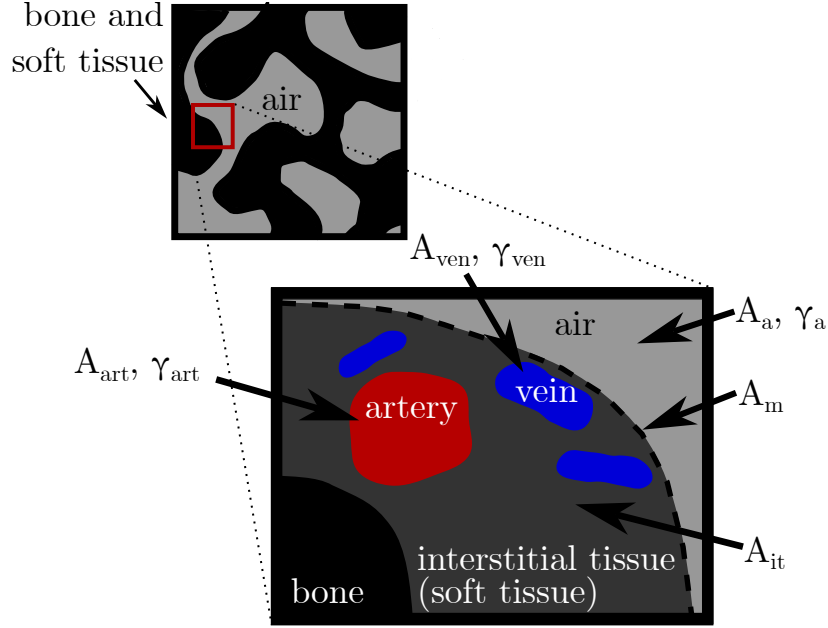

Figure S2: Cross-section of maxilloturbinates with variables listed in Table S1.

$$A_m = \gamma_m d_m, \quad (\text{S43})$$

$$\approx \gamma_a d_m. \quad (\text{S44})$$

Here  $\gamma_m$  is the perimeter of mucus lining,  $d_m$  is the thickness of the mucus lining,  $10 \mu\text{m}$ , and  $\gamma_a$  is the perimeter of the air cavity. Arteries and veins are denoted with subscripts a and v in Fig. S1 and illustrated in Fig. S2 also. The measured cross-sectional areas and perimeters are shown in Table S1. We calculated the approximated areas and perimeters of artery and vein from,

$$\gamma_{\text{art}} = \gamma_a \hat{\gamma}_{\text{art}}, \quad (\text{S45})$$

$$A_{\text{art}} = \gamma_a \hat{A}_{\text{art}}, \quad (\text{S46})$$

where  $\gamma_{\text{art}}$  is the perimeter of artery, and  $A_{\text{art}}$  is the cross-sectional area of artery.  $\gamma_a$  is the perimeter of the air cavity,  $\hat{\gamma}_{\text{art}}$  is the perimeter of artery per unit length and  $\hat{A}_{\text{art}}$  is the cross-sectional area of artery per unit length. The cross-sectional area and perimeter of the vein were obtained in the same manner.

The cross-section of the interstitial tissue contains arteries and veins, but the area of the avascular interstitial tissue can be obtained by subtracting the cross-sectional area of the arteries and veins from the total cross-sectional area of the tissue. The cross-sectional area of the interstitial tissue is known if  $r_{\text{art}}$  and  $r_{\text{ven}}$  are known, see Table S1. Variables in Table S1 are related as,

$$\begin{aligned} A_{\text{it}} &= (A_{\text{it}} + A_{\text{art}} + A_{\text{ven}})r_{\text{it}}, \\ A_{\text{it}} &= (A_{\text{it}} + A_a \hat{A}_{\text{art}} + A_a \hat{A}_{\text{ven}})(1 - (r_{\text{art}} + r_{\text{ven}})), \\ A_{\text{it}}(r_{\text{art}} + r_{\text{ven}}) &= (A_a \hat{A}_{\text{art}} + A_a \hat{A}_{\text{ven}})(1 - (r_{\text{art}} + r_{\text{ven}})), \\ A_{\text{it}} &= \frac{(A_a \hat{A}_{\text{art}} + A_a \hat{A}_{\text{ven}})(1 - (r_{\text{art}} + r_{\text{ven}}))}{r_{\text{art}} + r_{\text{ven}}}, \end{aligned} \quad (\text{S47})$$

where  $r_{\text{it}}$  is the ratio of the cross-sectional area of the interstitial tissue to the cross-sectional area of the whole tissue, while  $r_{\text{art}}$  is the cross-sectional area ratio of the artery to the tissue, and  $r_{\text{ven}}$  is the cross-sectional area ratio of the vein to the tissue. This is summarized below:

- $\frac{\text{Cross-sectional area of artery}}{\text{Perimeter of air cavity}} = \hat{A}_{\text{art}}$ . Therefore we can estimate cross-sectional area of artery,  $A_{\text{art}}$ .

- $\frac{\text{Perimeter of artery}}{\text{Perimeter of air cavity}} = \hat{\gamma}_{\text{art}}$ . Therefore we can estimate perimeter of artery,  $\gamma_{\text{art}}$ .
- $\frac{\text{Cross-sectional area of vein}}{\text{Perimeter of air cavity}} = \hat{A}_{\text{ven}}$ . Therefore we can estimate cross-sectional area of vein,  $A_{\text{ven}}$ .
- $\frac{\text{Perimeter of vein}}{\text{Perimeter of air cavity}} = \hat{\gamma}_{\text{ven}}$ . Therefore we can estimate perimeter of vein,  $\gamma_{\text{ven}}$ .

## 1.4 Heat and water recovery

The absolute amount of net water vapor we need to add to the expired air after completing a breathing cycle is denoted  $M_{w,\text{add}}$ . The value is calculated as the amount of water vapor entering the nose from the lungs during exhalation minus the amount of water vapor entering the nose ( $M_{w,\text{add}}$ ) from the ambient air during inhalation:

$$M_{w,\text{add}} = \int_{\text{ex}} (-F_{w,a})_{z=L} dt - \int_{\text{in}} (F_{w,a})_{z=0} dt, \quad (\text{S48})$$

where  $F_{w,a}$  is the mass flow of water vapor in nasal air. The absolute amount of water recovered ( $M_{w,\text{rec}}$ ) in the nose is the amount of water vapor entering the nose from the lungs during exhalation minus the amount of air flowing out through the nostrils during exhalation. This is obtained from,

$$M_{w,\text{rec}} = \int_{\text{ex}} (-F_{w,a})_{z=L} dt - \int_{\text{ex}} (-F_{w,a})_{z=0} dt. \quad (\text{S49})$$

The fractional recovery of water is thus  $M_{w,\text{rec}}/M_{w,\text{add}}$ .

The heat recovery can be obtained similarly. The heat added to the nasal cavity ( $Q_{\text{add}}$ ) is the sum of the heat that is necessary to warm up the inhaled air to the body temperature and the heat that is necessary to evaporate the water added during inhalation. This is:

$$Q_{\text{add}} = \int_{\text{in}} F_a c_{p,a} (T_{\text{body}} - T_{\text{amb}}) dt + M_{w,\text{add}} h_{w,\text{lat}}, \quad (\text{S50})$$

where  $F_a$  is air mass flow and  $c_{p,a}$  is specific heat capacity of air as  $1003 \text{ Jkg}^{-1}\text{K}^{-1}$  and  $h_{w,\text{lat}}$  is the latent heat of evaporation of water as  $2264 \text{ kJkg}^{-1}$ . The amount of recovered heat during exhalation ( $Q_{\text{rec}}$ ) is given by the sum of the sensible heat that is subtracted from the air during exhalation, and the latent heat that is released by condensing of water,

$$Q_{\text{rec}} = \int_{\text{ex}} F_a c_{p,a} (T_{\text{body}} - T_{\text{ex}}) dt + M_{w,\text{rec}} h_{w,\text{lat}}, \quad (\text{S51})$$

where  $T_{\text{ex}}$  is the expired air temperature and the fractional recovery of heat is calculated by  $Q_{\text{rec}}/Q_{\text{add}}$ . For further details on the recovery of water and heat, we refer to the literature [10, 18].

## 1.5 Input data related to thermodynamic properties

All variables related to physiological and thermodynamic properties are listed in Table S2. The input variables are used in most of the equations of the main part of the work.

Table S2: Variables relating to physiological and thermodynamic properties.

| Symbol              | Description                     | Value                | Unit                                          | Reference |
|---------------------|---------------------------------|----------------------|-----------------------------------------------|-----------|
| $h_{w, \text{lat}}$ | Latent heat of evaporation      | 2264                 | $\text{kJ kg}^{-1}$                           | [10, 19]  |
| $c_{p, a}$          | Specific heat capacity of air   | 1003                 | $\text{J kg}^{-1} \text{K}^{-1}$              | [7, 10]   |
| $c_{p, b}$          | Specific heat capacity of blood | 3620                 | $\text{J kg}^{-1} \text{K}^{-1}$              | [20]      |
| $\rho_b$            | Density of blood                | 1000                 | $\text{kg m}^{-3}$                            | [10]      |
| $k_b$               | Thermal conductivity of blood   | 0.50                 | $\text{J m}^{-1} \text{s}^{-1} \text{K}^{-1}$ | [10]      |
| $c_{p, m}$          | Specific heat capacity of mucus | 4186                 | $\text{J kg}^{-1} \text{K}^{-1}$              | [10]      |
| $\rho_m$            | Density of mucus                | 1000                 | $\text{kg m}^{-3}$                            | [10]      |
| $k_m$               | Thermal conductivity of mucus   | 0.60                 | $\text{J m}^{-1} \text{s}^{-1} \text{K}^{-1}$ | [10]      |
| $d_m$               | Mucus thickness                 | $1.0 \times 10^{-5}$ | m                                             | [21, 22]  |
| $F_b$               | Mass flow rate of blood         | $2.2 \times 10^{-4}$ | $\text{kg min}^{-1}$                          | [10]      |



## 2 Numerical verification of the solution

### 2.1 Grid size and residual analysis

The effect of grid size and its effect on variables' residuals were investigated. The length of the nose was divided into a  $N_s$  number of control volumes. The air temperature profile,  $T_a$ , and the entropy production profile were computed with varying  $N_s$ . The temperature profile and the local entropy production are presented in Fig. S3a and b as a function of  $N_s$ . We see that results have not converged for  $N_s = 6$ . Figs. S3a and b both imply that  $N_s$  should be larger than 12 to obtain grid convergence. We therefore chose 24 for the proper grid discretization number.

Specifically, the error regarding grid convergence index (GCI) is calculated based on [23, 24, 25]. GCI is an index to determine mesh refinement. By calculation processes introduced in [23, 24], we obtained an error band of the grid convergence of the solution as 2.83 % for the expired air temperature and 0.03 % for total entropy production. This is described as,

$$T_{a,\text{ex}} \approx 297.1 \pm 2.83 \%, \quad (\text{S52})$$

$$\Sigma_{\text{irr}} \approx 0.007 \pm 0.03 \%. \quad (\text{S53})$$

Residuals of the total entropy production ( $\Sigma_{\text{irr}}$ ), the air temperature for a cycle ( $T_a$ ), the expired air temperature ( $T_{a,\text{ex}}$ ) and the water content for a cycle ( $w_a$ ) were computed for various iteration numbers. The residual of a value of any parameter  $A$  at the  $i$ th cycle is given by,

$$\text{Residual of } A = \frac{|A^{i+1} - A^i|}{|A^2 - A^1|}, \quad (\text{S54})$$

for matrices, i.e.,  $w_a$  and  $T_a$ , we replace the absolute value by matrix norm,  $\|\dots\|_2$ . In our results, a residual in the range  $10^{-1.7} \sim 10^{-3.8}$  was considered to be sufficient (see Fig. S4). The residuals of  $\Sigma_{\text{irr}}$ ,  $T_a$ ,  $T_{a,\text{ex}}$  and  $w_a$  started to oscillate after about 180 cycles for temperatures at 283 K. From this, we infer that a number of iterations larger than 200 is needed.

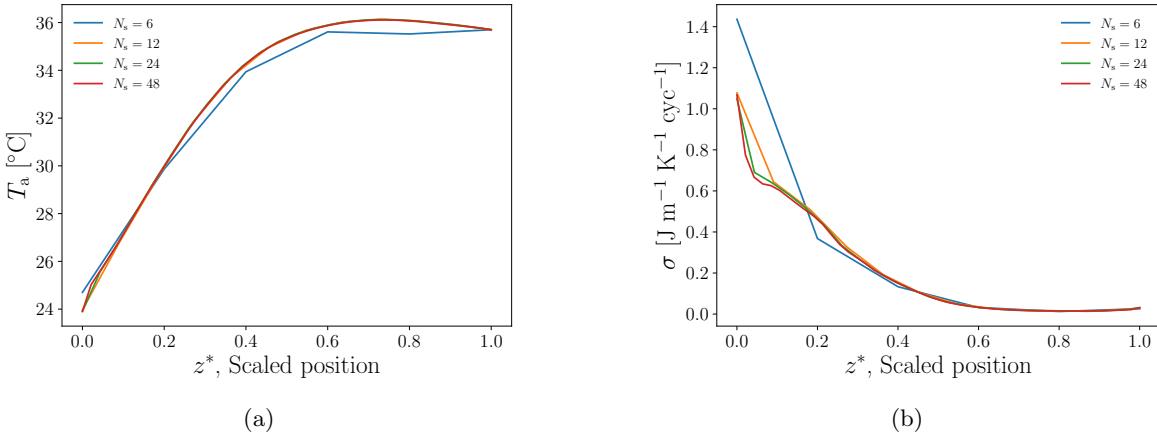

Figure S3: Time-averaged (a) air temperature profile and (b) local entropy production of the subtropical seal at 10 °C ambient temperature as a function of scaled position, for discretization numbers  $N_s \in \{6, 12, 24, 48\}$ . Time-averaging was done during the last half of the breathing cycle, referred to as exhalation.

The model is time-dependent and the discretization in time (time step) is decided by the MATLAB Integrated routine ‘ode15s’. In the ‘ode15s’ routine, the optimal time step is decided within a range of user-defined minima in every cycle (a single respiration cycle).

### 2.2 Computation time

The total time required to complete one simulation set with a discretization number in space,  $N_s \in \{6, 12, 24, 48\}$ , is listed in Table S3. The value  $N_s = 24$  gives results very near grid convergence, still with a reasonable computation time.

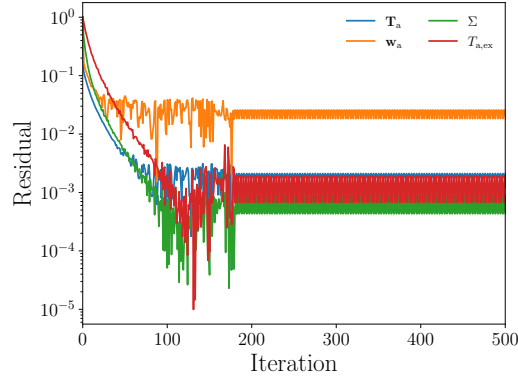

Figure S4: Residual of total entropy production ( $\Sigma$ ), air temperature ( $T_a$ ), expired air temperature during exhalation ( $T_{a,ex}$ ) and water mass fraction ( $w_a$ ) in a cycle as a function of iteration number at  $T_{amb} = 10$  °C.

Table S3: Discretization step and corresponding computation time with 10 °C and the geometry of the subtropical seal's turbine.

| Discretization in space | Computation time (dd:hh:mm) |
|-------------------------|-----------------------------|
| $N_s = 6$               | 10:03:54                    |
| $N_s = 12$              | 10:08:26                    |
| $N_s = 24$              | 11:09:36                    |
| $N_s = 48$              | 12:21:55                    |

### 3 Heat and water fluxes

Through the video of temperature profiles described in Fig.6-7 of the main text and Section 5, we have shown the temperature profiles of each subsystem. In this section, we present the heat and water transfer between subsystems in terms of flux profiles at -30 °C.

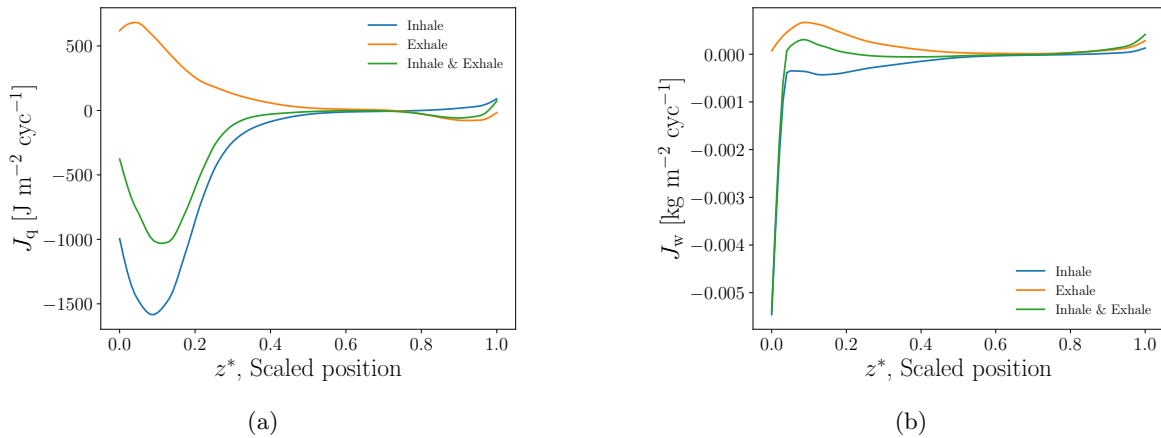

Figure S5: (a) Heat flux as a function of scaled position,  $z^*$ , averaged over inhalation, exhalation and both. (b) Water flux as a function of position,  $z^*$ , averaged over inhalation, exhalation and both. Inhalation (blue line) captures flux profiles during inhalation only, and exhalation (orange line) captures flux profiles during exhalation only. Inhale & Exhale (green line) shows time-averaged profiles over both inhalation and exhalation. Both fluxes are from the Arctic seal at -30 °C.

When cold air enters the inlet of the nose, heat is transferred from the mucus layer to the air, which will warm up the cold air and protect the lungs. This heat transfer is shown as a negative heat flux (blue line) in Fig. S5a. During exhalation, the absolute value of the flux shows a maximum around  $z^* \sim 0.03$ , which means that heat transfer takes place in a region behind the inlet of the nasal maxilloturbinate, and not only exactly at the inlet. The heat flux during exhalation is positive for  $z^* < 0.7$  (see orange line); in contrast, heat flux during inhalation appears negative. The averaged heat flux during a total breathing cycle shows a maximum at  $z^* \sim 0.1$ .

In Fig. S5b, mass flux is negative during inhalation, representing water transfer from the mucus lining to air (see blue line). During exhalation, however, the mass flux is positive in the given  $z^*$  domain and water in the air is transferred back to the mucus lining (see orange line). In other words, water vapor in the saturated air from the lungs is liquefied in the nose. The averaged flux during a whole respiration cycle is large at the nostril but close to zero at  $z^* > 0.2$ .

These results show directly how heat and mass transfer occur between subsystems when ambient air enters and exits the nose. The fluxes determine the local entropy production, which accordingly is large near the nostril, and decreases steeply at  $z^* \rightarrow 0.03$  in Fig. 8a of the main text. Variations in the local entropy production profile along the nose position have their origin in the interplay of heat and water transfer.

We examined the sensitivity of the fluxes and the local entropy production to changes in resistivity coefficients and mucus thickness. With a larger mucus thickness, the heat and mass fluxes increased significantly at the maximum. The entropy production also broadened in the nose’s anterior part and became less concentrated at the nostril (not shown).

## 4 Transfer coefficients

Interface transfer coefficients (known as interface resistivities) were used to describe heat and water transfer. Their values are listed in Table S4. We used coefficients taken from Wilhelmsen et al. [9].

| Temperature [K] | $R_{qq}$ [m <sup>2</sup> s/JK] | $R_{\mu q}$ [m <sup>2</sup> s/kgK] | $R_{\mu\mu}$ [Jm <sup>2</sup> s/kg <sup>2</sup> K] |
|-----------------|--------------------------------|------------------------------------|----------------------------------------------------|
| 260             | 4.24E-07                       | 3.68E-02                           | 4.73E+03                                           |
| 265             | 3.56E-07                       | 3.16E-02                           | 4.17E+03                                           |
| 270             | 2.98E-07                       | 2.71E-02                           | 3.66E+03                                           |
| 275             | 2.49E-07                       | 2.32E-02                           | 3.22E+03                                           |
| 280             | 2.08E-07                       | 1.98E-02                           | 2.82E+03                                           |
| 285             | 1.73E-07                       | 1.68E-02                           | 2.46E+03                                           |
| 290             | 1.43E-07                       | 1.43E-02                           | 2.14E+03                                           |
| 295             | 1.18E-07                       | 1.20E-02                           | 1.86E+03                                           |
| 300             | 9.66E-08                       | 1.01E-02                           | 1.60E+03                                           |
| 305             | 7.86E-08                       | 8.42E-03                           | 1.37E+03                                           |
| 310             | 6.35E-08                       | 6.97E-03                           | 1.17E+03                                           |
| 315             | 5.10E-08                       | 5.74E-03                           | 9.94E+02                                           |
| 320             | 4.07E-08                       | 4.69E-03                           | 8.37E+02                                           |

Table S4: Interface transfer coefficients related to water-evaporation.

## 5 Temperature profiles of a breathing cycle (video)

This section describes the details of a video showing the temperature profile at any moment of time in the breathing cycle, based on the model derived in this study.

The video shows the temperature profiles of the five subsystems of the Arctic seal, Eb, under Arctic conditions (-30 °C) at various moments. The upper panel of the video shows the temperature profiles which are indicated by the red vertical line on the panel below. The panel below shows the air flow rate variation during the breathing cycle. The left half describes the inhalation, and the other half describes exhalation. The flow rate of air is at its maximum value at  $t^* = 1/4$  and  $3/4$ .

We consider the temperature profiles at various times in a breathing cycle. At the start of the inhalation, the -30 °C air enters the nostril. As a result, the air temperature near the nostril end

( $z^* < 0.05$ ) is lower than the water temperature in the mucus lining. The temperature profiles of mucus, interstitial tissue, artery and vein subsystems are almost in thermal equilibrium. The air temperature shows a deviation due to the given boundary condition,  $z^* \sim 0$ . For further discussion, see the main text.

At the end of the inhalation ( $t^* \rightarrow 0.5$ ), the temperature of the air, mucus lining, interstitial tissue and vein are also almost at equilibrium. The change in the temperature profile of the air is larger than the variation of water temperature in the mucus lining. This can be expected considering that the thermal capacity of water is much larger than that of the air. When the inhalation is over, and the exhalation begins, the temperature of the air is higher than the temperature of the mucus lining ( $t^* > 0.5$ ). The warm air comes out of the lungs, and moves toward the nostril; heat and water vapor are adsorbed by the mucus.

## References

- [1] Jakobsen, H. A., 2008. Chemical reactor modeling. *Multiphase Reactive Flows* .
- [2] Kjelstrup, S., D. Bedeaux, E. Johannessen, and J. Gross, 2017. Non-equilibrium thermodynamics for engineers. World Scientific.
- [3] Kjelstrup, S., and D. Bedeaux, 2008. Non-equilibrium thermodynamics of heterogeneous systems. World Scientific.
- [4] Johannessen, E., and S. Kjelstrup, 2004. Minimum entropy production rate in plug flow reactors: An optimal control problem solved for SO<sub>2</sub> oxidation. *Energy* 29:2403–2423.
- [5] Magnanelli, E., S. B. B. Solberg, and S. Kjelstrup, 2019. Nature-inspired geometrical design of a chemical reactor. *Chemical Engineering Research and Design* 152:20–29.
- [6] Incropera, F. P., D. P. DeWitt, T. L. Bergman, A. S. Lavine, et al., 1996. Fundamentals of heat and mass transfer, volume 6. Wiley New York.
- [7] Cengel, Y. A., H. Pérez, et al., 2004. Heat transfer: a practical approach. Tata McGraw Hill Co.
- [8] Mason, M. J., L. M. Wenger, Ø. Hammer, and A. S. Blix, 2020. Structure and function of respiratory turbinates in phocid seals. *Polar Biology* 43:157–173.
- [9] Wilhelmsen, Ø., T. T. Trinh, A. Lervik, V. K. Badam, S. Kjelstrup, and D. Bedeaux, 2016. Coherent description of transport across the water interface: From nanodroplets to climate models. *Physical Review E* 93:032801.
- [10] Magnanelli, E., Ø. Wilhelmsen, M. Acquarone, L. P. Folkow, and S. Kjelstrup, 2017. The nasal geometry of the reindeer gives energy-efficient respiration. *Journal of Non-Equilibrium Thermodynamics* 42:59–78.
- [11] Solberg, S. B. B., S. Kjelstrup, E. Magnanelli, N. Kizilova, I. L. C. Barroso, M. Acquarone, and L. P. Folkow, 2020. Energy efficiency of respiration in mature and newborn reindeer. *Journal of Comparative Physiology B* 190:509–520.
- [12] Zamankhan, P., G. Ahmadi, Z. Wang, P. K. Hopke, Y.-S. Cheng, W. C. Su, and D. Leonard, 2006. Airflow and deposition of nano-particles in a human nasal cavity. *Aerosol science and technology* 40:463–476.
- [13] Flekkøy, E. G., L. P. Folkow, S. Kjelstrup, M. J. Mason, and Ø. Wilhelmsen, 2023. Thermal modeling of the respiratory turbinates in arctic and subtropical seals. *Journal of Thermal Biology* 103402.
- [14] Casado Barroso, I. L., 2014. The ontogeny of nasal heat exchange structures in Arctic artiodactyles. Master’s thesis, UiT Norges arktiske universitet.
- [15] Frederick, C., J. Morris, J. Kimbell, K. Morgan, and P. Scherer, 1994. Comparison of four biologically based dosimetry models for the deposition of rapidly metabolized vapors in the rodent nasal cavity. *Inhalation Toxicology* 6:135–135.

- [16] Morgan, K. T., X.-Z. Jiang, D. L. Patterson, and E. A. Gross, 1984. The nasal mucociliary apparatus: correlation of structure and function in the rat. *American Review of Respiratory Disease* 130:275–281.
- [17] Folkow, L., A. Blix, and T. Eide, 1988. Anatomical and functional aspects of the nasal mucosal and ophthalmic retia of phocid seals. *Journal of Zoology* 216:417–436.
- [18] Blix, A. S., and H. K. Johnsen, 1983. Aspects of nasal heat exchange in resting reindeer. *The Journal of physiology* 340:445–454.
- [19] Oliver, J. E., 2008. Encyclopedia of world climatology. Springer Science & Business Media. [https://doi.org/10.1007/1-4020-3266-8\\_124](https://doi.org/10.1007/1-4020-3266-8_124).
- [20] Rodríguez de Rivera, P. J., M. Rodríguez de Rivera, F. Socorro, G. M. Callicó, J. A. Calbet, and M. Rodríguez de Rivera, 2021. Heat flow, heat capacity and thermal resistance of localized surfaces of the human body using a new calorimetric sensor. *Journal of Thermal Analysis and Calorimetry* 1–14.
- [21] Bush, M. L., C. B. Frederick, J. S. Kimbell, and J. S. Ultman, 1998. A CFD–PBPK hybrid model for simulating gas and vapor uptake in the rat nose. *Toxicology and applied pharmacology* 150:133–145.
- [22] Kaulbach, H. C., M. V. White, Y. Igarashi, B. K. Hahn, and M. A. Kaliner, 1993. Estimation of nasal epithelial lining fluid using urea as a marker. *Journal of allergy and clinical immunology* 92:457–465.
- [23] Computational Fluid Dynamics (CFD) Verification and Validation Web Site of the NPARC Alliance. <https://www.grc.nasa.gov/www/wind/valid/tutorial/spatconv.html>.
- [24] Castedo, R., C. Reifarth, A. P. Santos, J. Losada, L. M. López, M. Chiquito, and J. M. Mancilla, 2019. Application of grid convergence index to shock wave validated with LS-DYNA and ProsAir. *Ingeniería e Investigación* 39:20–26.
- [25] Roache, P. J., 1998. Verification and validation in computational science and engineering, volume 895. Hermosa Albuquerque, NM.
